# Supplementary material for: Generation and direct EPR spectroscopic observation of triplet arylphosphinidenes: stabilisation versus internal rearrangements
Source: Royal Society of Chemistry journal article supplement (doi:10.1039/d0cp05254j), 2020-01-01
Supplement: d0cp05254j1.pdf [file d0cp05254j1.pdf]

## Supporting information

### **Generation and Direct EPR Spectroscopic Observation of Triplet Arylphosphinidenes: Stabilisation Versus Internal Rearrangements**

*Eugenii Ya. Misochko,<sup>a</sup> Alexander V. Akimov,<sup>a</sup> Denis V. Korchagin,<sup>a</sup> Yulia S. Ganushevich,<sup>b</sup> Egor A. Melnikov,<sup>b</sup> and Vasili A. Miluykov<sup>b</sup>*

<sup>a</sup> Institute of Problems of Chemical Physics, Russian Academy of Sciences, 142432 Chernogolovka, Moscow Region, Russian Federation

<sup>b</sup> Arbuzov Institute of Organic and Physical Chemistry, FRC Kazan Scientific Center, Russian Academy of Sciences, 420088 Kazan, Russian Federation

#### **The content:**

1. Experimental and computational details.
2. Experimental and calculated fine and hyperfine parameters of the studied triplet phosphinidenes
3. Calculated equilibrium structures and potential energy profiles for internal rearrangements of the studied phosphinidenes.
4. Cartesian coordinates of molecules under consideration.

#### **1. Experimental and computational details**

##### ***A. Synthesis of 1-arylphosphiranes***

All manipulations were performed under a nitrogen atmosphere using high-vacuum and standard Schlenk techniques. NMR spectra were recorded on Bruker 500 and 400 MHz NMR spectrometers. <sup>1</sup>H and <sup>13</sup>C NMR data are reported with reference to solvent resonances, and <sup>31</sup>P NMR spectra were reported with respect to external 85% H<sub>3</sub>PO<sub>4</sub> (0 ppm). GC-MS data were recorded on an Agilent Technologies 5977A MSD (He) using an HP-5MS column (150 °C).

PhPC<sub>2</sub>H<sub>4</sub> (**1**), AnthPC<sub>2</sub>H<sub>4</sub> (**2**), TippPC<sub>2</sub>H<sub>4</sub> (**3**) and Mes\*PC<sub>2</sub>H<sub>4</sub> (**4**) were prepared according to the literature through reactions of corresponding arylphosphine and ethylene glycol ditosylate [1].

##### *1-Phenylphosphirane (1).*

<sup>1</sup>H NMR (400 MHz, C<sub>6</sub>D<sub>6</sub>): δ = 7.24 – 7.18 (m, 2H, CHAr), 7.04 – 6.95 (m, 3H, CHAr), 1.09 – 1.01 (m, 2H, CH<sub>2</sub>), 0.95 – 0.85 (m, 2H, CH<sub>2</sub>). <sup>13</sup>C{<sup>1</sup>H} NMR (100 MHz, C<sub>6</sub>D<sub>6</sub>): δ = 139.6 (d, <sup>1</sup>J<sub>C-P</sub> = 40.6 Hz, CAr), 131.5 (d, <sup>2</sup>J<sub>C-P</sub> = 19.4 Hz, CAr), 127.9 (bs, CAr), 127.6 (bs, CAr), 127.4 (bs, CAr) 9.7 (d, <sup>1</sup>J<sub>C-P</sub> = 40.6 Hz, CH<sub>2</sub>). <sup>31</sup>P{<sup>1</sup>H} NMR (162 MHz, C<sub>6</sub>D<sub>6</sub>): δ = -236.9. MS (EI): 136.0 [M]<sup>+</sup>

##### *1-(9-Anthracene)phosphirane (2).*

$^1\text{H}$  NMR (400 MHz,  $\text{CDCl}_3$ ):  $\delta = 8.93\text{-}8.87$  (m, 2H, CHAr), 8.38 (s, 1H, CHAr), 8.00-7.96 (m, 2H, CHAr), 7.60-7.42 (m, 4H, CHAr), 1.74-1.38 (m, 4H).  $^{13}\text{C}\{^1\text{H}\}$  NMR (100 MHz,  $\text{CDCl}_3$ ):  $\delta = 135.1$  (d,  $J_{\text{C-P}} = 7.7$  Hz, CAr), 131.3-125.1 (CAr), 13.9 (d,  $^1J_{\text{C-P}} = 39.6$  Hz,  $\text{CH}_2$ ).  $^{31}\text{P}\{^1\text{H}\}$  NMR (162 MHz,  $\text{CDCl}_3$ ):  $\delta = -247.1$ . MS (EI): 236.0 [M]<sup>+</sup>.

*1-(2,4,6-Triisopropylphenyl)phosphirane (3).*

$^1\text{H}$  NMR (500 MHz,  $\text{CDCl}_3$ ):  $\delta = 7.14$  (d,  $^4J_{\text{P-H}} = 1.8$  Hz, 2H, CHAr), 4.23 (m, 2H,  $^i\text{Pr}$ ), 3.05 (m, 1H,  $^i\text{Pr}$ ), 1.49 (m, 18H,  $^i\text{Pr}$ ), 1.45 (m, 4H,  $\text{CH}_2$ ).  $^{13}\text{C}\{^1\text{H}\}$  NMR (126 MHz,  $\text{CDCl}_3$ ):  $\delta = 153.3$  (d,  $J_{\text{C-P}} = 8.6$  Hz, CAr), 134.6 (d,  $^1J_{\text{C-P}} = 41.4$  Hz, CAr), 122.2 (bs, CAr), 121.3 (bs, CAr), 34.38 (bs), 32.37 (d,  $J_{\text{C-P}} = 8.9$  Hz), 24.7, 24.3, 24.0 ( $^i\text{Pr}$ ), 12.7 (d,  $^1J_{\text{C-P}} = 39.7$  Hz,  $\text{CH}_2$ ).  $^{31}\text{P}\{^1\text{H}\}$  NMR (202 MHz,  $\text{C}_6\text{D}_6$ ):  $\delta = -242.1$ . MS (EI): 262.0 [M]<sup>+</sup>

*1-(2,4,6-Tri-*t*-butylphenyl)phosphirane (4).*

$^1\text{H}$  NMR (400 MHz,  $\text{CDCl}_3$ ):  $\delta = 7.16$  (d,  $^4J_{\text{P-H}} = 1.9$  Hz, 2H, CHAr), 1.61 (bs, 18H,  $^t\text{Bu}$ ), 1.26 (bs, 9H,  $^t\text{Bu}$ ), 1.11-1.01 (m, 2H,  $\text{CH}_2$ ), 0.91 – 0.85 (m, 2H,  $\text{CH}_2$ ).  $^{13}\text{C}\{^1\text{H}\}$  NMR (126 MHz,  $\text{C}_6\text{D}_6$ ):  $\delta = 156.2$ , 148.6 (d,  $^1J_{\text{C-P}} = 41.4$  Hz, CAr), 139.7, 122.2 (bs, CAr), 121.3 (bs, CAr), 122.4 (bs, CAr), 38.5, 34.3, 31.0, 14.5 (d,  $^1J_{\text{C-P}} = 39.9$  Hz,  $\text{CH}_2$ ).  $^{31}\text{P}\{^1\text{H}\}$  NMR (162 MHz,  $\text{C}_6\text{D}_6$ ):  $\delta = -216.2$ . MS (EI): 304.3 [M]<sup>+</sup>

**B. Sample preparation and EPR measurements.**

The X-band cw EPR spectra of triplet phosphinidenes were recorded after UV-irradiation of the corresponding 1-arylphosphirane (see Scheme 2) in glassy methylcyclohexane (MCH) at 5 K. In a typical procedure, the 1-arylphosphirane was dissolved in freshly distilled MCH in the ratio of 1:500 (1:1000 in the case of AnthPC<sub>2</sub>H<sub>4</sub> due to its low solubility in MCH), placed in a 3 mm o.d. quartz EPR tube, and sealed under vacuum. The sample tube was placed in the cavity of an EPR spectrometer equipped with a helium gas-flow thermostat. Then, the sample was cooled to 5 K to form glass and photolyzed at 60 K using a low-pressure mercury lamp (at  $\lambda = 254$  nm). EPR spectra were recorded at 5 K using a standard 9 GHz spectrometer (*Bruker Elexsys 500*, the modulation frequency 100 KHz) at a sufficiently low microwave power to avoid the saturation effects.

**C. Computational details.**

The geometries of all systems under consideration were optimized within the density functional theory (DFT) method at the B3LYP/def2-TZVP level of theory. The equilibrium (no imaginary frequency) and transition state (one imaginary frequency) geometry configurations were confirmed by vibrational frequency calculations. The Cartesian coordinates of the optimized species

are given in the Section 4. The based on DFT formalism ZFS parameters including the spin-spin (SS) and spin-orbit coupling (SOC) contributions to the total  $\mathbf{D}$  tensor were obtained at the PBE/Ahlich-DZ level of theory by using modified McWeeny-Mizuno equation [2] and coupled perturbed (CP) approach [3], respectively. Hyperfine constants were calculated at the B3LYP/def2-TZVPP level of theory.

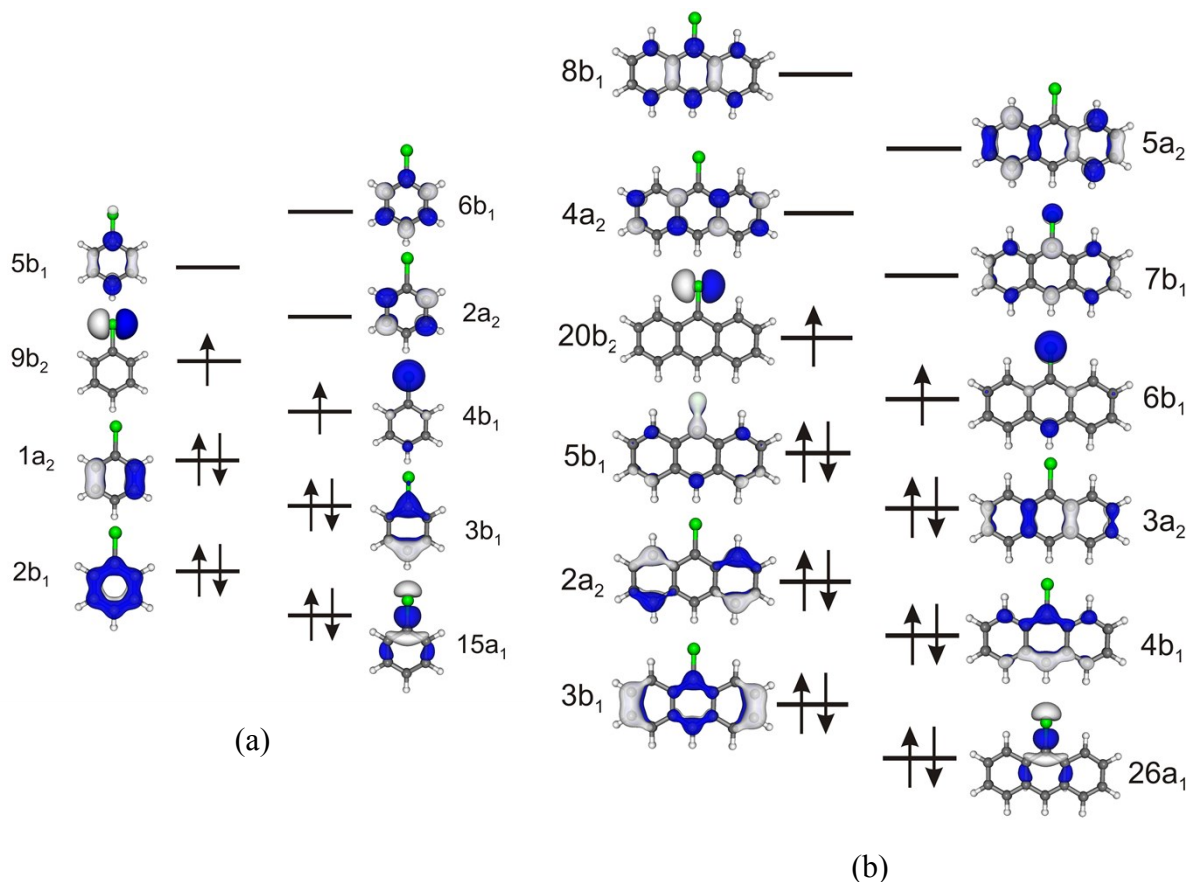

**Fig. S1.** The CASSCF active space of the phosphinidenes PhP (MesP, TippP, Mes\*P) (a) and AnthP (b).

In *ab initio* post Hartree-Fock calculations, the values of the  $\hat{D}$  tensor for phosphinidenes PhP, MesP, TippP, Mes\*P and AnthP were obtained employing the multiconfigurational formalism with ground triplet and three excited singlet states on the top of the state-average CASSCF wave function. The CASSCF active space consists of 9 orbitals and 10 electrons and 12 orbitals and 14 electrons for phosphinidenes PhP, MesP, TippP, Mes\*P and AnthP, respectively. The CASSCF active space of these phosphinidenes is shown in Fig. S1. Scalar relativistic effects were taken into account by a standard second-order Douglas-Kroll-Hess (DKH) procedure [4]. An all-electron relativistically contracted version of Ahlich polarized triple- $\zeta$  basis set DKH-def2-TZVP [5] was used for all atoms. The spin-orbit effects were included using the quasi degenerate perturbation

theory (QDPT) [6]. Dynamic electron correlations were taken into account including the N-electron valence second-order perturbation theory (NEVPT2) [7]. All calculations were performed with the ORCA program package (version 4.0.1.2) [8].

## 2. Experimental and calculated fine and hyperfine parameters of the studied triplet phosphinidenes

**Table S1.** Calculated and experimental ZFS parameters  $D$  ( $\text{cm}^{-1}$ ) in triplet phosphinidenes R -P<sup>\*\*</sup> and calculated spin densities on phosphorus atom  $\rho(\text{P}\cdot)$ .

| R-P  | PBE/Ahlfriech-DZ / CASSCF/NEVPT2 calculations |                         |                         |                          |                       | Expt.               |        |
|------|-----------------------------------------------|-------------------------|-------------------------|--------------------------|-----------------------|---------------------|--------|
|      | $D_{\text{SS}}$                               | $D_{\text{SO}}$         | $D_{\text{SS+SO}}$      | $E/D$                    | $\rho(\text{P}\cdot)$ | $D$                 | $E/D$  |
| Anth | 0.298 / 0.286                                 | 3.748 / 2.967           | 4.046 / 3.253           | 0.0284/0.000             | 1.63                  | 3.741               | 0.0013 |
| Mes  | 0.319 / 0.303                                 | 3.890 / 3.296           | 4.209 / 3.599           | 0.0200/0.0005            | 1.80                  | 4.116 <sup>a)</sup> | 0.0010 |
| Tipp | 0.315 / 0.304                                 | 4.005 / 3.329           | 4.320 / 3.633           | 0.0165/0.0009            | 1.78                  | 4.252               | 0.0014 |
| Ph   | 0.336 / 0.308                                 | 4.029 / 3.439           | 4.365 / 3.747           | 0.0153/0.0002            | 1.86                  | 4.322               | 0.0010 |
| H    | 0.414 / 0.367                                 | 3.951 / 3.043           | 4.365 / 3.410           | 0.000 / 0.001            | 2.0                   | 4.4 <sup>b)</sup>   | -      |
| Dmp  | 0.326 / - <sup>c)</sup>                       | 4.016 / - <sup>c)</sup> | 4.342 / - <sup>c)</sup> | 0.0167 / - <sup>c)</sup> | 1.82                  | -                   | -      |
| Mes* | 0.310 / 0.315                                 | 4.120 / 3.563           | 4.430 / 3.877           | 0.0176 / 0.000           | 1.75                  | -                   | -      |

<sup>a)</sup> data from Ref. [9]. <sup>b)</sup> data from Ref. [10], <sup>c)</sup> unable to calculate by *ab initio* approach

**Table S2.** The DFT calculated contributions of different excitations to the spin-orbit term of the ZFS parameter  $D$ .

| Contribution              | <i>PhP</i> | <i>AnthP</i> | <i>MesP</i> | <i>TippP</i> | <i>Mes*P</i> | <i>DmpP</i> |
|---------------------------|------------|--------------|-------------|--------------|--------------|-------------|
| SPIN-ORBIT                | 4.029      | 3.748        | 3.885       | 4.005        | 4.120        | 4.016       |
| SOMO->VMO (alpha->alpha)  | -0.005     | -0.044       | -0.023      | -0.017       | -0.019       | -0.019      |
| DOMO->SOMO (beta ->beta ) | 0.309      | 0.198        | 0.288       | 0.279        | 0.274        | 0.301       |
| SOMO->SOMO (alpha->beta)  | 3.845      | 3.707        | 3.738       | 3.860        | 3.980        | 3.852       |
| DOMO->VMO (beta ->alpha)  | -0.119     | -0.114       | -0.118      | -0.117       | -0.116       | -0.118      |

## 4. Calculated equilibrium structures and potential energy profiles for internal rearrangements of the studied phosphinidenes.

A. Internal rearrangement of *MesP*:

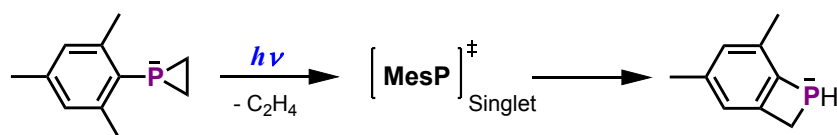

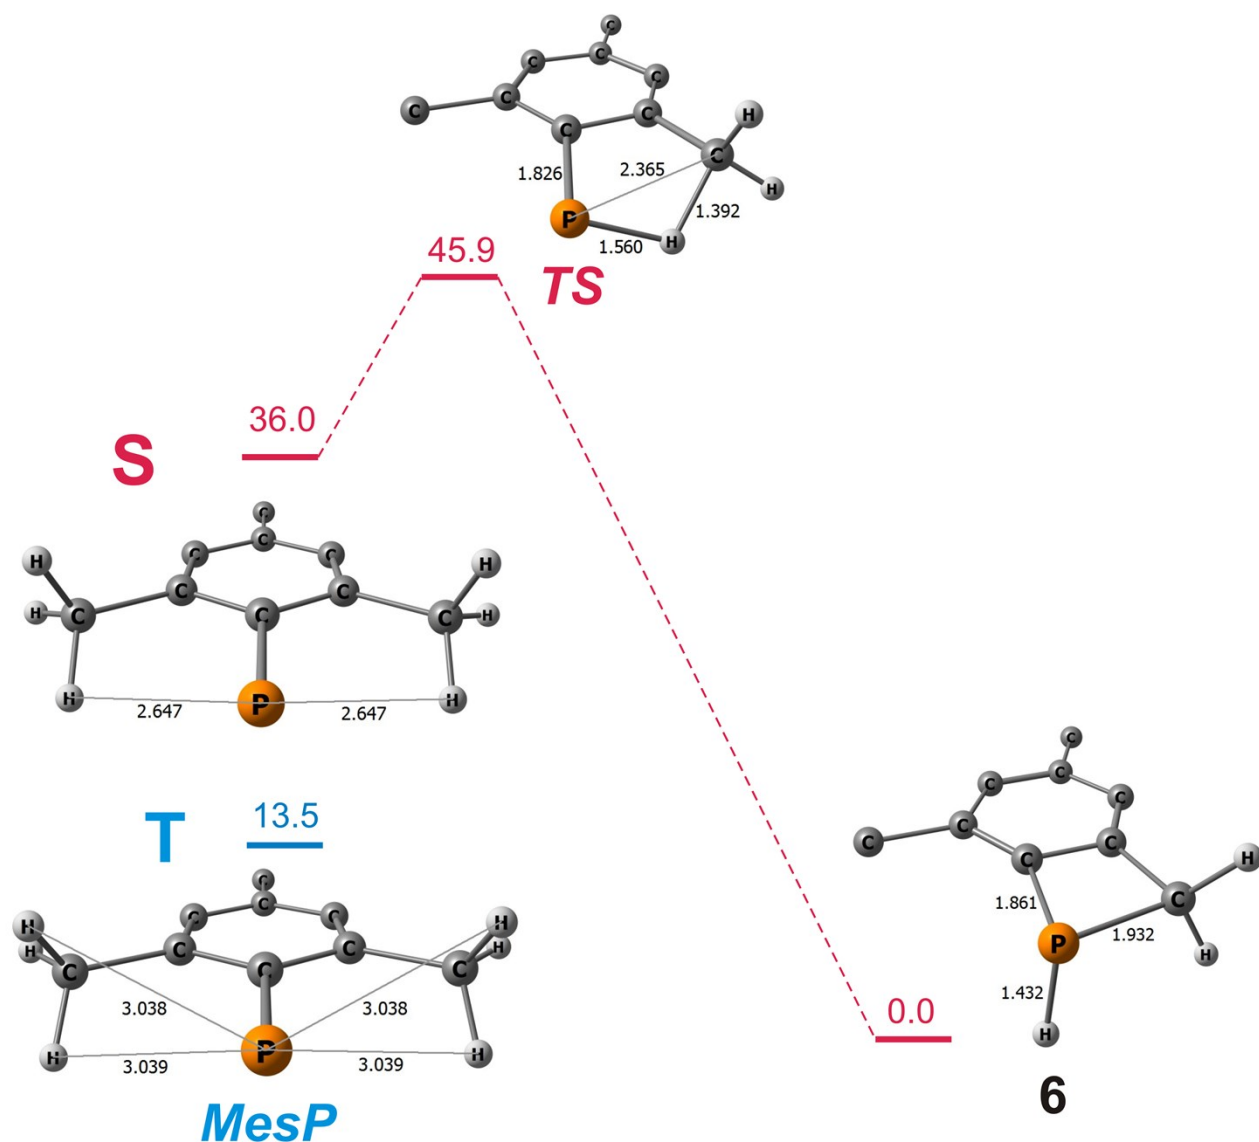

**Fig. S2.** Calculated potential energy profile for internal rearrangement of singlet MesP.

### *B. Internal rearrangements of TippP.*

We examined two possible rearrangements of the excited intermediates TippP\* producing the products with four-membered (**7a**) or five-membered (**7b**) cycles. Figure S3 demonstrates the rearrangements in TippP, producing both products, **7a** and **7b**.

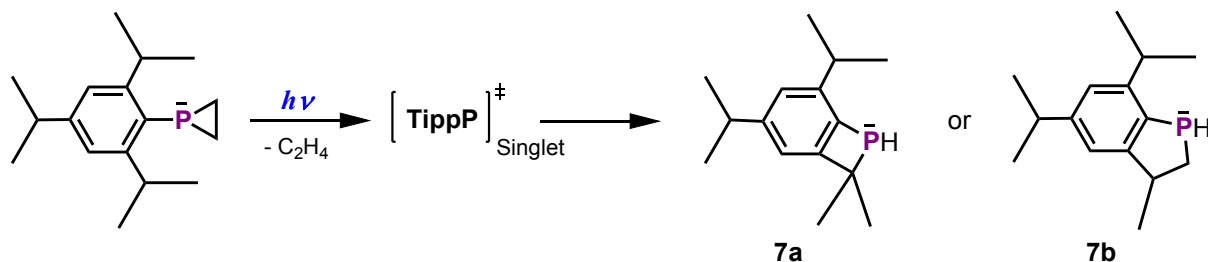

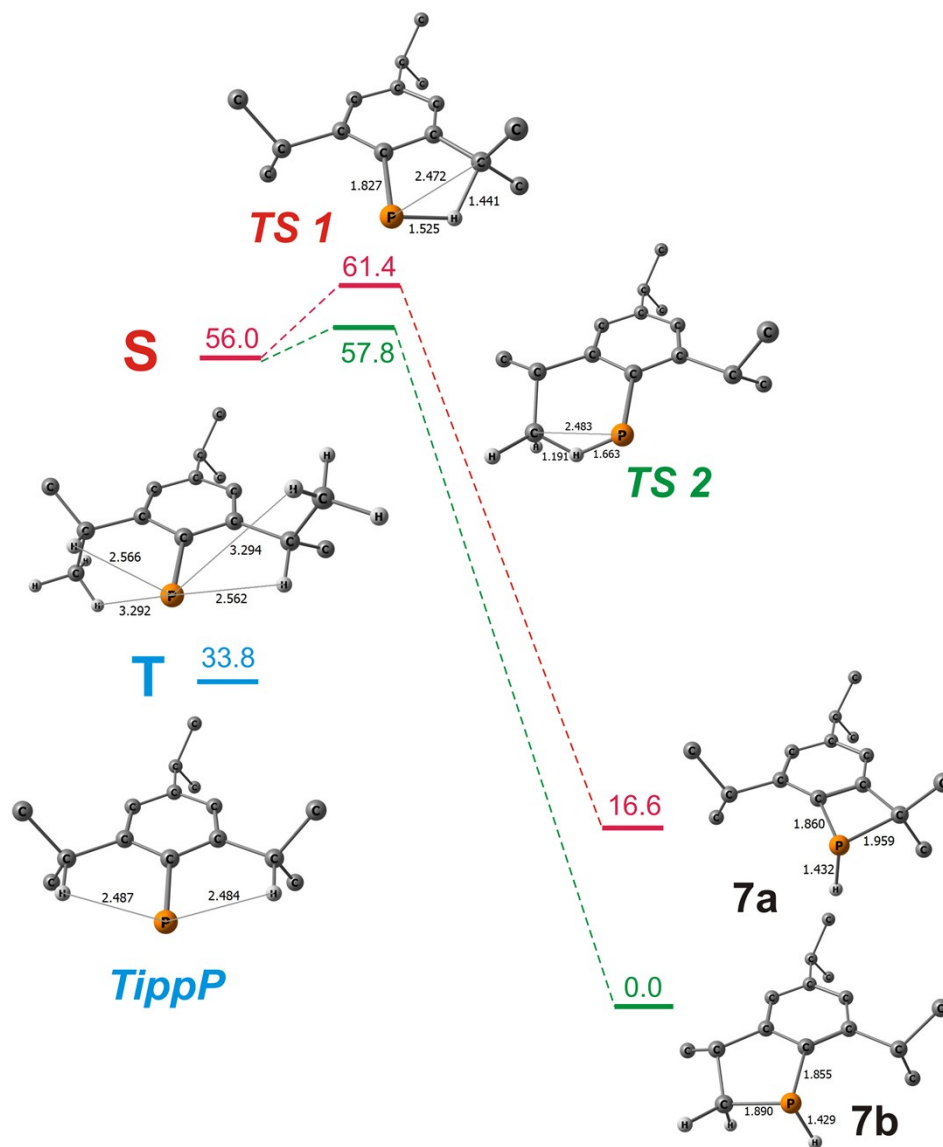

**Fig. S3.** Calculated potential energy profile for internal rearrangement of singlet TippP.

## References

1. X. Li, K.D. Robinson, P.P. Gaspar, *J. Org. Chem.* 1996, 61, 7702-7710.
2. R. McWeeny, Y. Mizuno, Proc. R. Soc. London, Ser. A 1961, 259, 554-577, T. T. Petrenko, T. L. Petrenko, and V. Y Bratus, *J. Phys.: Condens. Matter*, 2002, 14, 12433.
3. F. Neese, *J. Chem. Phys.* 2007, 127, 164112.
4. B. A. Hess, *Phys. Rev. A*, 1986, 33, 3742-3748.
5. D. A. Pantazis, X.-Y. Chen, C. R. Landis and F. Neese, *J. Chem. Theory Comput.*, 2008, 4, 908-919, A. Schafer, C. Huber and R. Ahlrichs, *J. Chem. Phys.*, 1994, 100, 5829-5835, A. Schafer, H. Horn and R. Ahlrichs, *J. Chem. Phys.*, 1992, 97, 2571-2577, F. Weigend and R. Ahlrichs, *Physical Chemistry Chemical Physics*, 2005, 7, 3297-3305.
6. D. Ganyushin and F. Neese, *J. Chem. Phys.*, 2006, 125, 024103.
7. C. Angeli, R. Cimiraglia, S. Evangelisti, T. Leininger and J. P. Malrieu, *J. Chem. Phys.*, 2001, 114, 10252-10264, C. Angeli, R. Cimiraglia and J.-P. Malrieu, *Chem. Phys. Lett.*, 2001, 350, 297-305, C. Angeli and R. Cimiraglia, *Theor. Chem. Acc.*, 2002, 107, 313-317, C. Angeli, R. Cimiraglia and J.-P. Malrieu, *J. Chem. Phys.*, 2002, 117, 9138-9153.
8. F. Neese, *Wiley Interdisciplinary Reviews: Computational Molecular Science*, 2012, 2, 73-78, Neese, F. Software update: the ORCA program system, version 4.0. *Comput. Mol. Sci.* 2018, 8, e1327–e1327-6.
9. A. V. Akimov, Y. S Ganushevich, D. V. Korchagin, V. A. Miluykov, E. Ya. Misochko, *Angew. Chem. Int. Ed.* **2017**, 56, 7944-7947; *Angew. Chem.* **2017**, 129, 8052-8055.
10. K. P. Huber, G. Herzberg, in *Constants of diatomic molecules. Molecular spectra and molecular structure*, Van Nostrand Reinhold: NY, **1979**.

#### 4. Cartesian coordinates of molecules under consideration.

|                                                                                   |             |                                                                                                |              |
|-----------------------------------------------------------------------------------|-------------|------------------------------------------------------------------------------------------------|--------------|
| <b>PhP_T</b>                                                                      |             | Method : UB3LYP/def2-TZVP<br>Charge : 0<br>Multiplicity : 3<br>Total energy: -572.8298164 a.u. |              |
| 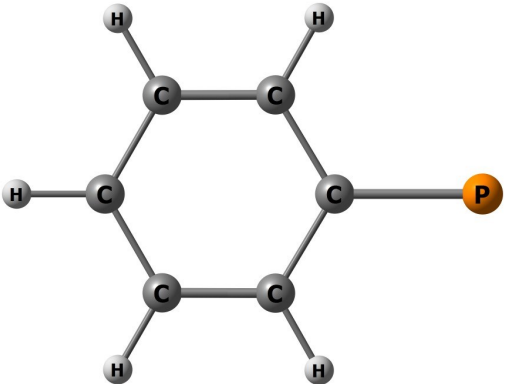 |             |                                                                                                |              |
| 6                                                                                 | 0.000000000 | 0.000000000                                                                                    | 0.512087000  |
| 6                                                                                 | 0.000000000 | 1.210089000                                                                                    | -0.211981000 |
| 6                                                                                 | 0.000000000 | -1.210089000                                                                                   | -0.211981000 |
| 1                                                                                 | 0.000000000 | 2.152828000                                                                                    | 0.321763000  |
| 1                                                                                 | 0.000000000 | -2.152828000                                                                                   | 0.321763000  |
| 6                                                                                 | 0.000000000 | 1.206640000                                                                                    | -1.599085000 |
| 6                                                                                 | 0.000000000 | -1.206640000                                                                                   | -1.599085000 |
| 1                                                                                 | 0.000000000 | 2.144369000                                                                                    | -2.142031000 |
| 1                                                                                 | 0.000000000 | -2.144369000                                                                                   | -2.142031000 |
| 6                                                                                 | 0.000000000 | 0.000000000                                                                                    | -2.296861000 |
| 1                                                                                 | 0.000000000 | 0.000000000                                                                                    | -3.378535000 |
| 15                                                                                | 0.000000000 | 0.000000000                                                                                    | 2.321017000  |



AnthP\_T

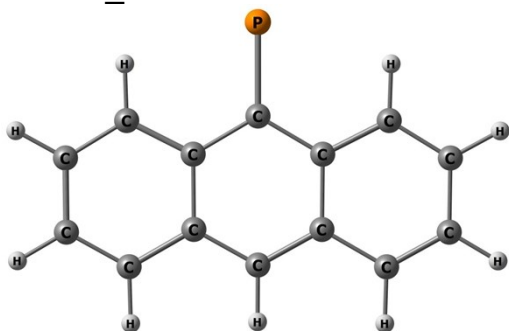

Method : UB3LYP/def2-TZVP  
Charge : 0  
Multiplicity : 3  
Total energy: -880.00765085 a.u.

|    |              |              |              |
|----|--------------|--------------|--------------|
| 6  | -1.273261000 | 0.024059000  | -2.105973000 |
| 6  | -1.273261000 | -0.043781000 | -0.686090000 |
| 6  | -1.273261000 | -1.288117000 | 0.028378000  |
| 6  | -1.273261000 | 1.199398000  | 0.034926000  |
| 6  | -1.273261000 | 1.187443000  | 1.432418000  |
| 6  | -1.273261000 | -0.006599000 | 2.159942000  |
| 6  | -1.273261000 | -1.263775000 | 1.462951000  |
| 6  | -1.273261000 | 1.222399000  | -2.768294000 |
| 6  | -1.273261000 | 2.428963000  | -0.687060000 |
| 1  | -1.273261000 | 2.133162000  | 1.963030000  |
| 6  | -1.273261000 | 0.004067000  | 3.584553000  |
| 6  | -1.273261000 | -2.449539000 | 2.247930000  |
| 6  | -1.273261000 | -2.403686000 | 3.616431000  |
| 6  | -1.273261000 | -1.161534000 | 4.296748000  |
| 1  | -1.273261000 | 0.963047000  | 4.089896000  |
| 1  | -1.273261000 | -3.409464000 | 1.745676000  |
| 1  | -1.273261000 | -3.323489000 | 4.188287000  |
| 1  | -1.273261000 | -1.142624000 | 5.378242000  |
| 6  | -1.273261000 | 2.444606000  | -2.052729000 |
| 1  | -1.273261000 | -0.899201000 | -2.672733000 |
| 1  | -1.273261000 | 1.238012000  | -3.850085000 |
| 1  | -1.273261000 | 3.355493000  | -0.124110000 |
| 1  | -1.273261000 | 3.382606000  | -2.594364000 |
| 15 | -1.273261000 | -2.845710000 | -0.857917000 |

MesP\_T

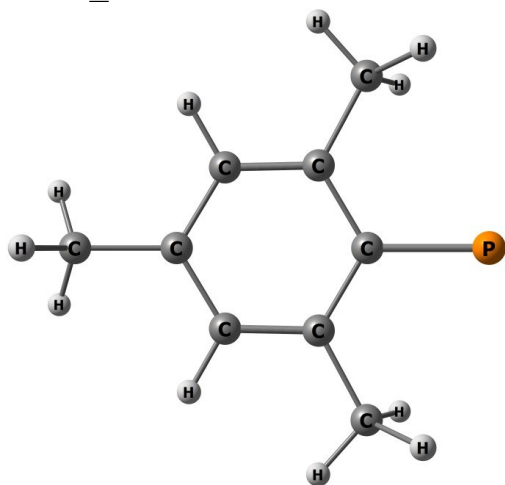

Method : UB3LYP/def2-TZVP

Charge : 0

Multiplicity : 3

Total energy: -691.0270951 a.u.

|    |              |              |              |
|----|--------------|--------------|--------------|
| 6  | -0.132729000 | 1.224927000  | -0.003441000 |
| 6  | -0.854503000 | 0.000000000  | 0.001545000  |
| 6  | 1.256161000  | 1.197066000  | -0.011123000 |
| 6  | 1.256161000  | -1.197066000 | -0.011123000 |
| 6  | -0.132729000 | -1.224927000 | -0.003441000 |
| 6  | 1.973889000  | 0.000000000  | -0.011720000 |
| 15 | -2.659767000 | 0.000000000  | 0.009740000  |
| 1  | 1.798467000  | -2.136981000 | -0.018559000 |
| 1  | 1.798467000  | 2.136981000  | -0.018559000 |
| 6  | -0.847766000 | -2.552719000 | -0.004084000 |
| 1  | -1.485924000 | -2.664846000 | 0.876392000  |
| 1  | -1.492190000 | -2.661026000 | -0.880461000 |
| 1  | -0.134413000 | -3.377484000 | -0.008309000 |
| 6  | -0.847766000 | 2.552719000  | -0.004084000 |
| 1  | -1.492190000 | 2.661026000  | -0.880461000 |
| 1  | -1.485924000 | 2.664846000  | 0.876392000  |
| 1  | -0.134413000 | 3.377484000  | -0.008309000 |
| 6  | 3.479277000  | 0.000000000  | 0.017118000  |
| 1  | 3.887799000  | -0.884269000 | -0.474819000 |
| 1  | 3.887799000  | 0.884269000  | -0.474819000 |
| 1  | 3.849060000  | 0.000000000  | 1.047531000  |

MesP\_S

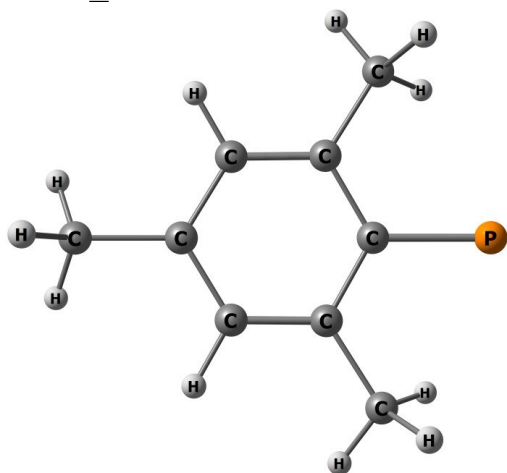

Method : UB3LYP/def2-TZVP

Charge : 0

Multiplicity : 1

Total energy: -690.9784672 a.u.

|    |              |              |              |
|----|--------------|--------------|--------------|
| 6  | 0.118547000  | -1.218542000 | 0.003708000  |
| 6  | 0.819771000  | 0.000003000  | -0.001892000 |
| 6  | -1.270973000 | -1.195983000 | -0.011522000 |
| 6  | -1.270978000 | 1.195979000  | -0.011521000 |
| 6  | 0.118542000  | 1.218545000  | 0.003706000  |
| 6  | -1.991824000 | -0.000003000 | -0.013619000 |
| 15 | 2.618789000  | 0.000001000  | -0.021068000 |
| 1  | -1.806683000 | 2.140527000  | -0.035248000 |
| 1  | -1.806673000 | -2.140533000 | -0.035251000 |
| 6  | 0.918377000  | 2.491689000  | 0.029689000  |
| 1  | 1.325808000  | 2.688376000  | 1.027159000  |
| 1  | 1.771175000  | 2.422400000  | -0.668261000 |
| 1  | 0.335893000  | 3.363933000  | -0.270385000 |
| 6  | 0.918389000  | -2.491682000 | 0.029690000  |
| 1  | 1.771190000  | -2.422387000 | -0.668256000 |
| 1  | 1.325816000  | -2.688371000 | 1.027161000  |
| 1  | 0.335912000  | -3.363928000 | -0.270393000 |
| 6  | -3.499770000 | -0.000006000 | 0.001820000  |
| 1  | -3.903367000 | 0.882537000  | -0.498141000 |
| 1  | -3.903364000 | -0.882550000 | -0.498142000 |
| 1  | -3.888022000 | -0.000008000 | 1.025421000  |

MesP\_TS

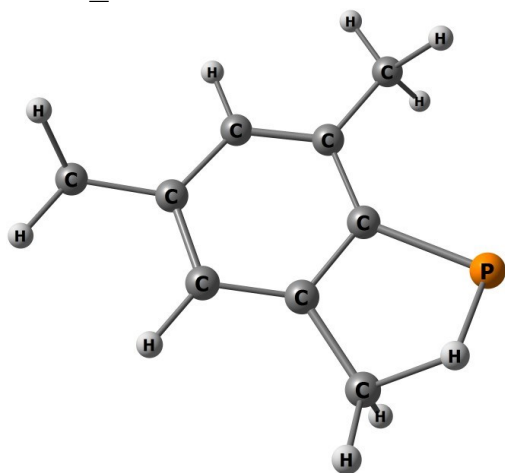

Method : UB3LYP/def2-TZVP

Charge : 0

Multiplicity : 1

Total energy: -690.9753643 a.u.

|    |              |              |              |
|----|--------------|--------------|--------------|
| 6  | 0.073439000  | 1.294432000  | 0.034230000  |
| 6  | -0.780605000 | 0.182697000  | 0.015015000  |
| 6  | 1.440594000  | 1.034109000  | 0.015360000  |
| 6  | 1.109923000  | -1.351727000 | -0.020263000 |
| 6  | -0.257700000 | -1.112953000 | 0.047044000  |
| 6  | 1.980543000  | -0.263589000 | -0.023618000 |
| 15 | -2.593081000 | -0.023346000 | -0.073158000 |
| 1  | 1.497622000  | -2.365027000 | -0.038090000 |
| 1  | 2.125738000  | 1.876959000  | 0.014962000  |
| 6  | -1.396944000 | -2.052887000 | 0.129976000  |
| 1  | -1.808251000 | -2.231042000 | 1.118098000  |
| 1  | -2.301586000 | -1.414898000 | -0.714443000 |
| 1  | -1.385849000 | -2.964570000 | -0.470558000 |
| 6  | -0.474249000 | 2.695520000  | 0.042893000  |
| 1  | -1.091889000 | 2.883860000  | -0.841314000 |
| 1  | -1.106177000 | 2.867866000  | 0.919754000  |
| 1  | 0.324858000  | 3.437493000  | 0.055778000  |
| 6  | 3.476268000  | -0.460461000 | -0.042226000 |
| 1  | 3.735448000  | -1.507802000 | -0.203593000 |
| 1  | 3.946250000  | 0.125833000  | -0.835944000 |
| 1  | 3.932448000  | -0.149328000 | 0.902246000  |

6

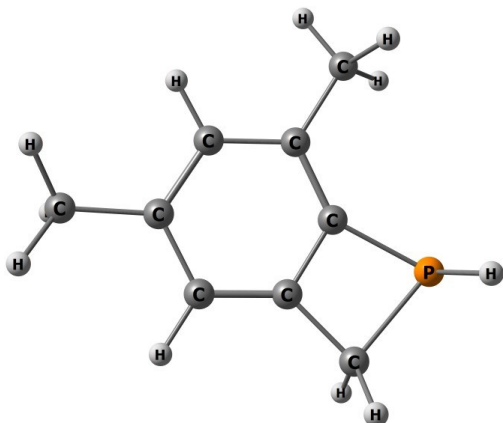

Method : UB3LYP/def2-TZVP

Charge : 0

Multiplicity : 1

Total energy: -691.0485691 a.u.

|    |              |              |              |
|----|--------------|--------------|--------------|
| 6  | -0.169308000 | 1.328208000  | 0.004837000  |
| 6  | 0.733994000  | 0.271044000  | 0.020023000  |
| 6  | -1.521563000 | 0.967573000  | 0.009001000  |
| 6  | -1.020412000 | -1.401758000 | 0.017297000  |
| 6  | 0.322786000  | -1.060004000 | 0.025266000  |
| 6  | -1.960640000 | -0.364038000 | 0.012316000  |
| 15 | 2.546918000  | -0.120209000 | -0.128763000 |
| 1  | -1.345746000 | -2.436728000 | 0.020039000  |
| 1  | -2.268190000 | 1.755819000  | 0.006498000  |
| 6  | 1.634036000  | -1.815528000 | 0.027834000  |
| 1  | 1.800282000  | -2.478821000 | -0.821685000 |
| 1  | 2.931337000  | 0.032994000  | 1.242502000  |
| 1  | 1.854772000  | -2.351535000 | 0.951307000  |
| 6  | 0.271932000  | 2.766751000  | 0.009738000  |
| 1  | 0.663027000  | 3.054915000  | 0.990053000  |
| 1  | 1.070042000  | 2.935699000  | -0.717246000 |
| 1  | -0.553932000 | 3.438180000  | -0.228423000 |
| 6  | -3.437432000 | -0.672749000 | -0.024730000 |
| 1  | -3.664812000 | -1.595806000 | 0.511502000  |
| 1  | -4.024684000 | 0.131235000  | 0.421719000  |
| 1  | -3.786231000 | -0.799818000 | -1.054307000 |

TippP\_T

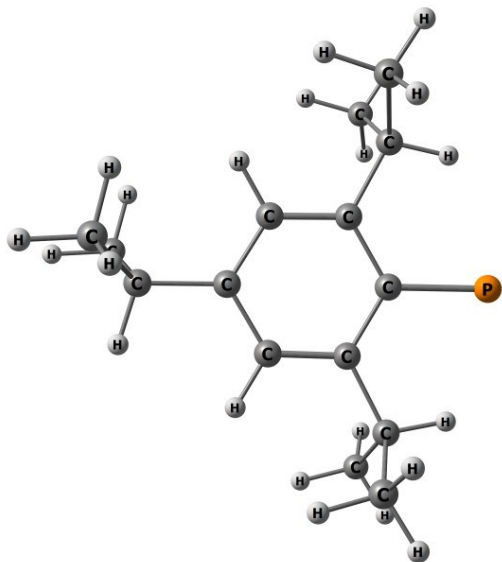

Method : UB3LYP/def2-TZVP

Charge : 0

Multiplicity : 3

Total energy: -926.9819478 a.u.

|    |              |              |              |
|----|--------------|--------------|--------------|
| 6  | -0.510175000 | 1.143485000  | 0.000105000  |
| 6  | 0.888673000  | 0.878788000  | 0.000037000  |
| 6  | -1.403043000 | 0.079786000  | 0.000010000  |
| 6  | 0.394075000  | -1.495438000 | -0.000191000 |
| 6  | 1.334569000  | -0.470530000 | -0.000064000 |
| 6  | -0.977739000 | -1.250380000 | -0.000175000 |
| 15 | 2.085148000  | 2.244564000  | -0.000063000 |
| 1  | 0.735930000  | -2.524922000 | -0.000299000 |
| 1  | -2.466331000 | 0.290623000  | 0.000059000  |
| 6  | -1.969638000 | -2.400968000 | -0.000291000 |
| 1  | -1.382414000 | -3.324669000 | -0.000867000 |
| 6  | -2.840413000 | -2.408883000 | -1.267330000 |
| 6  | -2.839449000 | -2.409842000 | 1.267401000  |
| 1  | -2.224520000 | -2.437164000 | 2.168927000  |
| 1  | -3.471729000 | -1.520469000 | 1.321084000  |
| 1  | -3.495136000 | -3.283978000 | 1.275745000  |
| 1  | -3.473001000 | -1.519652000 | -1.319692000 |
| 1  | -3.495859000 | -3.283194000 | -1.275964000 |
| 1  | -2.226167000 | -2.435192000 | -2.169348000 |
| 6  | 2.816678000  | -0.823339000 | 0.000001000  |
| 1  | 3.375393000  | 0.118026000  | 0.000040000  |
| 6  | 3.225856000  | -1.587150000 | -1.269314000 |
| 6  | 3.225661000  | -1.587154000 | 1.269386000  |
| 1  | 2.965029000  | -1.025761000 | 2.168622000  |
| 1  | 2.731755000  | -2.560138000 | 1.327173000  |
| 1  | 4.304386000  | -1.761373000 | 1.278645000  |
| 1  | 2.731949000  | -2.560128000 | -1.327209000 |
| 1  | 4.304578000  | -1.761389000 | -1.278381000 |
| 1  | 2.965394000  | -1.025743000 | -2.168591000 |
| 6  | -1.051236000 | 2.568286000  | 0.000233000  |

|   |              |             |              |
|---|--------------|-------------|--------------|
| 1 | -0.189515000 | 3.243598000 | 0.000493000  |
| 6 | -1.860574000 | 2.876949000 | 1.269521000  |
| 6 | -1.860082000 | 2.877241000 | -1.269321000 |
| 1 | -1.268835000 | 2.692601000 | -2.168218000 |
| 1 | -2.761194000 | 2.262393000 | -1.329478000 |
| 1 | -2.171993000 | 3.924505000 | -1.277185000 |
| 1 | -2.761756000 | 2.262158000 | 1.329215000  |
| 1 | -2.172451000 | 3.924223000 | 1.277497000  |
| 1 | -1.269697000 | 2.692096000 | 2.168620000  |

TippP\_S

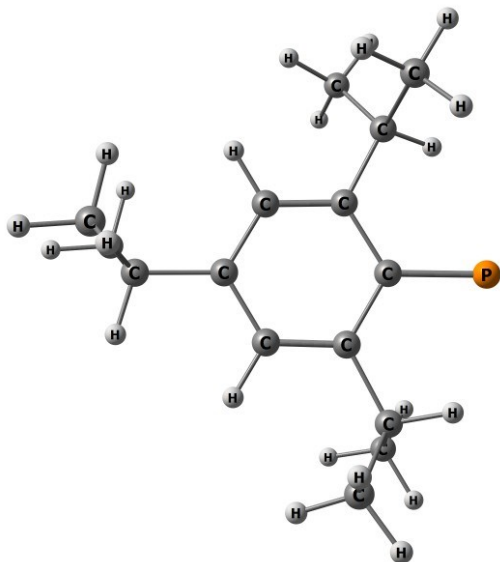

Method : UB3LYP/def2-TZVP

Charge : 0

Multiplicity : 1

Total energy: -926.9465104 a.u.

|    |              |              |              |
|----|--------------|--------------|--------------|
| 6  | -0.501643000 | 1.152721000  | -0.073665000 |
| 6  | 0.915563000  | 0.858320000  | -0.008903000 |
| 6  | -1.416047000 | 0.114290000  | -0.041826000 |
| 6  | 0.342762000  | -1.518597000 | 0.046391000  |
| 6  | 1.314720000  | -0.529197000 | 0.075979000  |
| 6  | -1.020574000 | -1.226695000 | 0.001622000  |
| 15 | 2.129770000  | 2.153580000  | -0.064338000 |
| 1  | 0.642775000  | -2.559228000 | 0.077590000  |
| 1  | -2.473720000 | 0.343781000  | -0.068416000 |
| 6  | -2.043627000 | -2.346556000 | 0.003460000  |
| 1  | -1.485692000 | -3.287062000 | 0.039797000  |
| 6  | -2.882419000 | -2.355656000 | -1.285725000 |
| 6  | -2.943521000 | -2.294692000 | 1.249748000  |
| 1  | -2.352179000 | -2.314207000 | 2.166995000  |
| 1  | -3.553323000 | -1.388695000 | 1.262752000  |
| 1  | -3.620657000 | -3.151848000 | 1.263301000  |
| 1  | -3.485275000 | -1.449337000 | -1.375008000 |
| 1  | -3.563300000 | -3.209956000 | -1.287955000 |
| 1  | -2.247876000 | -2.424618000 | -2.171155000 |
| 6  | 2.777473000  | -0.928028000 | 0.135537000  |
| 1  | 3.306226000  | -0.050554000 | 0.520515000  |
| 6  | 3.341025000  | -1.202902000 | -1.271131000 |
| 6  | 3.055229000  | -2.111851000 | 1.071834000  |
| 1  | 2.631304000  | -1.945108000 | 2.063998000  |
| 1  | 2.657362000  | -3.054554000 | 0.687454000  |
| 1  | 4.133624000  | -2.242147000 | 1.186404000  |
| 1  | 2.835090000  | -2.048846000 | -1.744574000 |
| 1  | 4.406942000  | -1.436699000 | -1.212827000 |
| 1  | 3.222670000  | -0.334475000 | -1.922023000 |
| 6  | -0.998009000 | 2.585479000  | -0.112372000 |



|   |              |             |              |
|---|--------------|-------------|--------------|
| 1 | -0.174158000 | 3.168925000 | -0.536807000 |
| 6 | -1.240819000 | 3.129570000 | 1.308075000  |
| 6 | -2.239963000 | 2.789838000 | -0.989320000 |
| 1 | -2.098264000 | 2.372867000 | -1.988256000 |
| 1 | -3.137702000 | 2.339585000 | -0.557653000 |
| 1 | -2.439512000 | 3.858167000 | -1.097963000 |
| 1 | -2.031633000 | 2.571528000 | 1.816855000  |
| 1 | -1.541894000 | 4.179191000 | 1.265263000  |
| 1 | -0.338265000 | 3.063329000 | 1.918568000  |

**TippP\_TS1**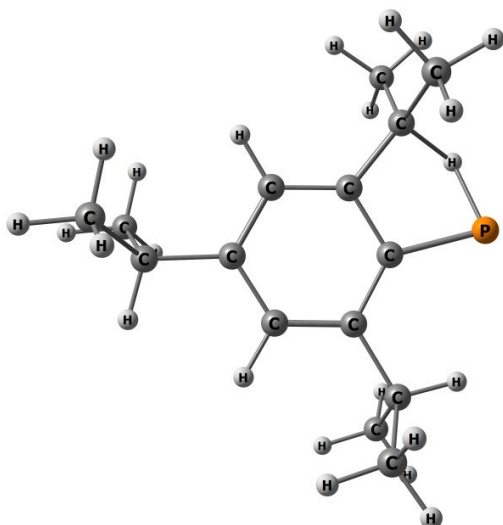

Method : UB3LYP/def2-TZVP

Charge : 0

Multiplicity : 1

Total energy: -926.9379159 a.u.

|    |              |              |              |
|----|--------------|--------------|--------------|
| 6  | -0.394806000 | -1.103107000 | -0.032551000 |
| 6  | -1.111655000 | 0.098392000  | -0.057867000 |
| 6  | 0.990572000  | -1.125567000 | -0.059187000 |
| 6  | 0.957362000  | 1.277807000  | 0.023896000  |
| 6  | -0.439062000 | 1.322193000  | -0.001736000 |
| 6  | 1.690855000  | 0.086271000  | -0.013296000 |
| 15 | -2.883835000 | -0.330358000 | -0.179165000 |
| 1  | 1.510043000  | 2.211434000  | 0.065368000  |
| 1  | 1.528972000  | -2.066982000 | -0.075384000 |
| 6  | 3.211190000  | 0.119072000  | 0.020133000  |
| 1  | 3.502598000  | 1.174282000  | 0.023279000  |
| 6  | 3.835426000  | -0.523496000 | -1.228888000 |
| 6  | 3.774680000  | -0.513723000 | 1.303406000  |
| 1  | 3.361794000  | -0.034650000 | 2.193263000  |
| 1  | 3.535095000  | -1.578839000 | 1.357366000  |
| 1  | 4.862952000  | -0.416595000 | 1.337852000  |
| 1  | 3.603350000  | -1.590082000 | -1.285843000 |
| 1  | 4.923794000  | -0.423585000 | -1.211860000 |
| 1  | 3.464644000  | -0.052975000 | -2.141479000 |
| 6  | -1.204744000 | 2.635425000  | 0.007175000  |
| 1  | -2.271778000 | 2.381911000  | 0.010765000  |
| 6  | -0.941388000 | 3.462618000  | -1.261224000 |
| 6  | -0.932986000 | 3.458007000  | 1.276141000  |
| 1  | -1.156117000 | 2.880359000  | 2.175054000  |
| 1  | 0.113140000  | 3.768883000  | 1.329556000  |
| 1  | -1.548474000 | 4.361022000  | 1.289898000  |
| 1  | 0.105945000  | 3.769034000  | -1.319434000 |
| 1  | -1.554497000 | 4.367420000  | -1.267835000 |
| 1  | -1.171793000 | 2.888336000  | -2.160385000 |
| 6  | -1.346023000 | -2.257617000 | 0.000637000  |
| 1  | -2.421905000 | -1.665360000 | -0.753838000 |

|   |              |              |              |
|---|--------------|--------------|--------------|
| 6 | -1.727469000 | -2.798751000 | 1.365426000  |
| 6 | -1.122550000 | -3.347925000 | -1.034396000 |
| 1 | -0.996150000 | -2.938541000 | -2.036580000 |
| 1 | -0.205237000 | -3.886497000 | -0.772205000 |
| 1 | -1.938930000 | -4.071837000 | -1.041214000 |
| 1 | -0.952011000 | -3.508211000 | 1.683486000  |
| 1 | -2.673112000 | -3.343059000 | 1.334155000  |
| 1 | -1.801198000 | -2.007692000 | 2.107472000  |

**TippP\_TS2**

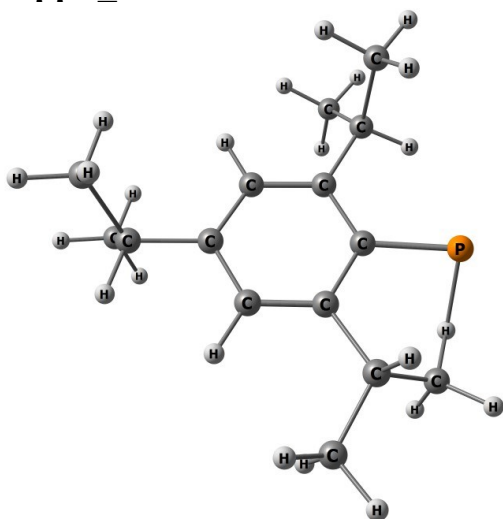

Method : UB3LYP/def2-TZVP

Charge : 0

Multiplicity : 1

Total energy: -926.9437653 a.u.

|    |              |              |              |
|----|--------------|--------------|--------------|
| 6  | -0.155560000 | 1.163571000  | -0.057000000 |
| 6  | 1.035387000  | 0.417389000  | 0.010515000  |
| 6  | -1.374567000 | 0.485924000  | -0.046450000 |
| 6  | -0.260341000 | -1.624982000 | 0.103089000  |
| 6  | 0.972671000  | -0.987180000 | 0.121652000  |
| 6  | -1.454861000 | -0.904215000 | 0.021658000  |
| 15 | 2.684516000  | 1.209772000  | -0.008402000 |
| 1  | -0.309131000 | -2.706098000 | 0.162694000  |
| 1  | -2.290586000 | 1.062330000  | -0.105546000 |
| 6  | -2.792421000 | -1.627667000 | 0.010471000  |
| 1  | -2.571932000 | -2.697898000 | 0.081390000  |
| 6  | -3.558957000 | -1.405121000 | -1.303347000 |
| 6  | -3.661728000 | -1.259523000 | 1.223740000  |
| 1  | -3.131768000 | -1.446251000 | 2.159751000  |
| 1  | -3.942356000 | -0.203567000 | 1.205157000  |
| 1  | -4.583658000 | -1.846843000 | 1.230972000  |
| 1  | -3.825062000 | -0.353288000 | -1.432793000 |
| 1  | -4.485105000 | -1.985671000 | -1.314299000 |
| 1  | -2.959161000 | -1.704348000 | -2.165088000 |
| 6  | 2.297758000  | -1.704385000 | 0.330530000  |
| 1  | 2.597122000  | -1.479824000 | 1.362869000  |
| 6  | 3.375665000  | -1.107815000 | -0.570407000 |
| 6  | 2.259361000  | -3.226538000 | 0.164730000  |
| 1  | 1.582973000  | -3.684738000 | 0.887809000  |
| 1  | 1.928594000  | -3.511321000 | -0.837135000 |
| 1  | 3.250452000  | -3.654995000 | 0.329138000  |
| 1  | 3.365132000  | -1.558653000 | -1.571458000 |
| 1  | 4.378559000  | -1.144979000 | -0.155262000 |
| 1  | 3.198627000  | -0.014581000 | -1.009111000 |
| 6  | -0.091948000 | 2.682569000  | -0.093209000 |
| 1  | 0.924295000  | 2.939024000  | -0.430865000 |
| 6  | -0.277070000 | 3.286176000  | 1.310679000  |

|   |              |             |              |
|---|--------------|-------------|--------------|
| 6 | -1.061131000 | 3.320473000 | -1.096490000 |
| 1 | -0.937897000 | 2.893762000 | -2.093385000 |
| 1 | -2.102439000 | 3.183050000 | -0.795758000 |
| 1 | -0.883087000 | 4.396329000 | -1.162651000 |
| 1 | -1.284804000 | 3.087911000 | 1.684527000  |
| 1 | -0.132040000 | 4.369398000 | 1.289490000  |
| 1 | 0.431977000  | 2.862612000 | 2.024626000  |

**7a**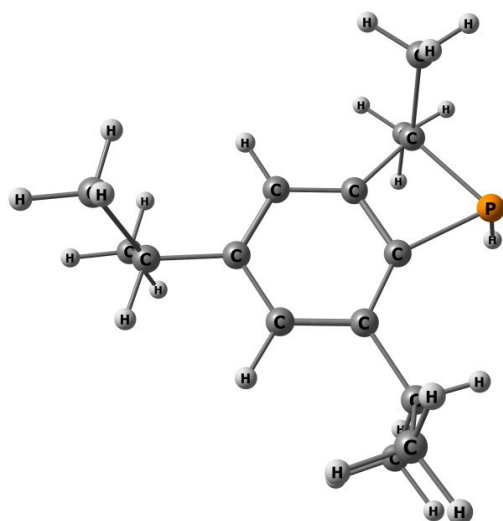

Method : UB3LYP/def2-TZVP

Charge : 0

Multiplicity : 1

Total energy: -927.0094392 a.u.

|    |              |              |              |
|----|--------------|--------------|--------------|
| 6  | 0.655737000  | -0.944046000 | 0.005633000  |
| 6  | 0.994786000  | 0.406958000  | 0.004194000  |
| 6  | -0.664954000 | -1.357522000 | -0.000678000 |
| 6  | -1.294417000 | 0.979571000  | -0.000748000 |
| 6  | 0.039973000  | 1.414306000  | -0.009539000 |
| 6  | -1.663356000 | -0.370429000 | 0.003694000  |
| 15 | 2.828758000  | 0.125682000  | -0.130301000 |
| 1  | -2.088237000 | 1.719769000  | 0.000559000  |
| 1  | -0.929438000 | -2.409131000 | -0.004429000 |
| 6  | -3.136797000 | -0.751270000 | 0.011138000  |
| 1  | -3.705732000 | 0.183774000  | 0.007389000  |
| 6  | -3.526139000 | -1.519630000 | 1.284500000  |
| 6  | -3.535867000 | -1.535789000 | -1.249161000 |
| 1  | -3.288443000 | -0.979755000 | -2.155457000 |
| 1  | -3.020789000 | -2.498329000 | -1.297101000 |
| 1  | -4.610534000 | -1.734612000 | -1.254321000 |
| 1  | -3.009049000 | -2.480611000 | 1.341336000  |
| 1  | -4.600472000 | -1.719782000 | 1.299858000  |
| 1  | -3.273159000 | -0.951375000 | 2.181666000  |
| 6  | 0.414534000  | 2.885527000  | -0.020602000 |
| 1  | 1.506930000  | 2.929635000  | -0.075260000 |
| 6  | -0.011178000 | 3.593206000  | 1.276250000  |
| 6  | -0.136268000 | 3.614664000  | -1.256098000 |
| 1  | 0.191595000  | 3.131376000  | -2.178283000 |
| 1  | -1.228754000 | 3.628985000  | -1.255819000 |
| 1  | 0.208768000  | 4.651368000  | -1.274271000 |
| 1  | -1.098535000 | 3.597930000  | 1.384697000  |
| 1  | 0.328563000  | 4.631911000  | 1.276609000  |
| 1  | 0.409163000  | 3.097597000  | 2.153424000  |
| 6  | 2.007888000  | -1.648139000 | -0.004485000 |
| 1  | 3.182416000  | 0.287556000  | 1.247840000  |

|   |             |              |              |
|---|-------------|--------------|--------------|
| 6 | 2.263665000 | -2.502395000 | -1.246798000 |
| 6 | 2.325697000 | -2.417995000 | 1.276075000  |
| 1 | 2.120556000 | -1.821607000 | 2.166229000  |
| 1 | 1.717603000 | -3.327070000 | 1.332803000  |
| 1 | 3.375416000 | -2.722473000 | 1.301797000  |
| 1 | 1.613253000 | -3.383065000 | -1.244401000 |
| 1 | 3.298453000 | -2.852542000 | -1.274677000 |
| 1 | 2.069228000 | -1.946878000 | -2.165944000 |

7b

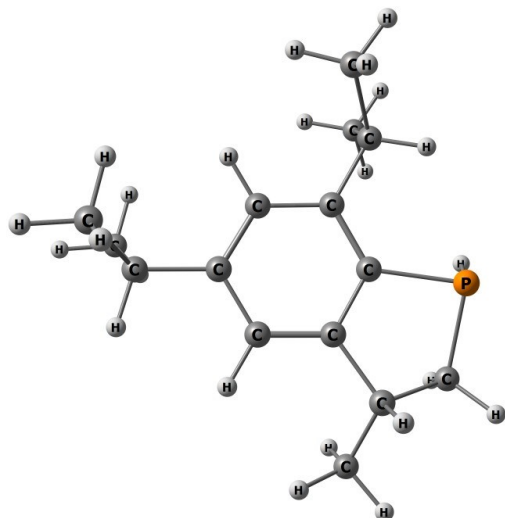

Method : UB3LYP/def2-TZVP

Charge : 0

Multiplicity : 1

Total energy: -927.0358344 a.u.

|    |              |              |              |
|----|--------------|--------------|--------------|
| 6  | 0.129796000  | 1.143835000  | -0.070421000 |
| 6  | -1.016768000 | 0.344233000  | -0.130814000 |
| 6  | 1.370424000  | 0.504917000  | -0.017798000 |
| 6  | 0.334345000  | -1.654799000 | -0.137720000 |
| 6  | -0.918346000 | -1.052077000 | -0.177380000 |
| 6  | 1.495635000  | -0.885401000 | -0.048653000 |
| 15 | -2.776382000 | 0.910691000  | -0.289606000 |
| 1  | 0.419819000  | -2.735344000 | -0.171835000 |
| 1  | 2.267183000  | 1.109989000  | 0.049835000  |
| 6  | 2.858871000  | -1.557623000 | 0.010154000  |
| 1  | 2.678984000  | -2.636866000 | -0.026238000 |
| 6  | 3.593001000  | -1.260989000 | 1.327654000  |
| 6  | 3.733272000  | -1.198323000 | -1.201873000 |
| 1  | 3.229063000  | -1.442821000 | -2.138779000 |
| 1  | 3.969445000  | -0.131622000 | -1.219231000 |
| 1  | 4.678296000  | -1.746598000 | -1.170779000 |
| 1  | 3.827488000  | -0.197895000 | 1.421108000  |
| 1  | 4.534669000  | -1.813582000 | 1.375969000  |
| 1  | 2.986831000  | -1.545490000 | 2.189879000  |
| 6  | -2.239754000 | -1.790232000 | -0.331828000 |
| 1  | -2.396999000 | -1.949681000 | -1.407431000 |
| 6  | -3.343627000 | -0.832972000 | 0.166890000  |
| 6  | -2.305774000 | -3.157033000 | 0.353681000  |
| 1  | -1.576873000 | -3.855407000 | -0.062313000 |
| 1  | -2.111769000 | -3.064668000 | 1.425082000  |
| 1  | -3.294924000 | -3.602482000 | 0.225244000  |
| 1  | -3.442559000 | -0.913293000 | 1.250999000  |
| 1  | -4.309827000 | -1.063926000 | -0.281685000 |
| 1  | -2.929567000 | 1.527442000  | 0.989993000  |
| 6  | 0.026327000  | 2.661355000  | -0.015500000 |
| 1  | -1.000184000 | 2.922517000  | -0.292135000 |



|   |              |             |              |
|---|--------------|-------------|--------------|
| 6 | 0.949258000  | 3.363657000 | -1.021782000 |
| 6 | 0.264141000  | 3.184302000 | 1.411567000  |
| 1 | -0.418528000 | 2.716857000 | 2.123854000  |
| 1 | 1.284639000  | 2.970914000 | 1.739459000  |
| 1 | 0.115376000  | 4.266170000 | 1.457495000  |
| 1 | 2.003462000  | 3.207965000 | -0.781631000 |
| 1 | 0.768348000  | 4.441127000 | -1.013447000 |
| 1 | 0.778548000  | 2.999243000 | -2.036402000 |

Mes\*P\_T

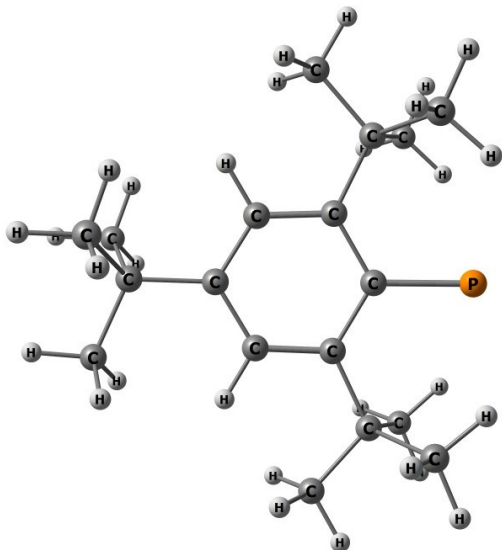

Method : UB3LYP/def2-TZVP  
Charge : 0  
Multiplicity : 3  
Total energy: -1044.9346599 a.u.

|    |              |              |              |
|----|--------------|--------------|--------------|
| 6  | 0.559102000  | -1.207475000 | -0.000095000 |
| 6  | 1.180550000  | 0.085095000  | 0.000032000  |
| 6  | -0.834322000 | -1.276949000 | -0.000235000 |
| 6  | -1.030022000 | 1.091671000  | -0.000090000 |
| 6  | 0.349111000  | 1.259549000  | -0.000036000 |
| 6  | -1.654321000 | -0.155331000 | -0.000201000 |
| 15 | 2.993660000  | 0.237161000  | 0.000288000  |
| 1  | -1.657748000 | 1.967144000  | 0.000002000  |
| 1  | -1.301081000 | -2.245439000 | -0.000396000 |
| 6  | -3.188740000 | -0.244186000 | 0.000027000  |
| 6  | -3.745277000 | 0.454575000  | 1.260367000  |
| 6  | -3.695039000 | -1.696038000 | -0.000926000 |
| 1  | -3.364075000 | -2.243045000 | -0.886229000 |
| 1  | -3.364457000 | -2.244196000 | 0.883807000  |
| 1  | -4.787011000 | -1.700824000 | -0.001114000 |
| 1  | -3.366230000 | -0.019070000 | 2.168527000  |
| 1  | -4.836595000 | 0.393492000  | 1.275541000  |
| 1  | -3.471419000 | 1.509901000  | 1.294458000  |
| 6  | 0.905439000  | 2.711647000  | -0.000074000 |
| 6  | 1.741749000  | 2.979894000  | 1.272078000  |
| 6  | -0.214028000 | 3.774193000  | -0.000278000 |
| 1  | -0.847562000 | 3.711190000  | -0.887197000 |
| 1  | -0.847669000 | 3.711424000  | 0.886584000  |
| 1  | 0.245921000  | 4.764077000  | -0.000378000 |
| 1  | 1.137572000  | 2.823344000  | 2.168616000  |
| 1  | 2.093374000  | 4.014851000  | 1.275395000  |
| 1  | 2.618024000  | 2.335514000  | 1.343680000  |
| 6  | 1.349711000  | -2.547358000 | -0.000072000 |
| 6  | 0.419228000  | -3.779908000 | -0.000212000 |
| 6  | 2.218181000  | -2.674298000 | 1.272160000  |
| 1  | 2.975803000  | -1.893591000 | 1.344028000  |

|   |              |              |              |
|---|--------------|--------------|--------------|
| 1 | 1.596268000  | -2.619817000 | 2.168564000  |
| 1 | 2.735850000  | -3.636986000 | 1.275500000  |
| 1 | -0.216348000 | -3.820021000 | 0.886416000  |
| 1 | 1.034479000  | -4.681452000 | -0.000218000 |
| 1 | -0.216214000 | -3.819944000 | -0.886939000 |
| 6 | 2.218432000  | -2.674156000 | -1.272144000 |
| 1 | 2.975969000  | -1.893352000 | -1.343830000 |
| 1 | 2.736212000  | -3.636788000 | -1.275444000 |
| 1 | 1.596667000  | -2.619710000 | -2.168654000 |
| 6 | 1.741977000  | 2.979678000  | -1.272128000 |
| 1 | 2.093714000  | 4.014599000  | -1.275513000 |
| 1 | 2.618197000  | 2.335204000  | -1.343529000 |
| 1 | 1.137908000  | 2.823100000  | -2.168733000 |
| 6 | -3.746174000 | 0.456379000  | -1.258873000 |
| 1 | -4.837473000 | 0.394886000  | -1.273528000 |
| 1 | -3.472833000 | 1.511878000  | -1.291521000 |
| 1 | -3.367490000 | -0.015687000 | -2.168014000 |

Mes\*P\_S

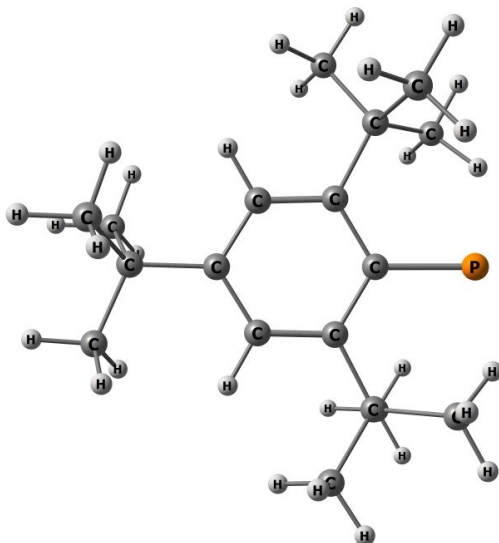

Method : UB3LYP/def2-TZVP  
Charge : 0  
Multiplicity : 1  
Total energy: -1044.9128014 a.u.

|    |              |              |              |
|----|--------------|--------------|--------------|
| 6  | -0.485790000 | -1.211272000 | -0.029676000 |
| 6  | -1.154722000 | 0.041554000  | 0.002612000  |
| 6  | 0.908498000  | -1.244944000 | -0.039261000 |
| 6  | 1.021598000  | 1.119201000  | 0.041069000  |
| 6  | -0.363766000 | 1.226973000  | 0.031175000  |
| 6  | 1.696854000  | -0.100775000 | 0.001468000  |
| 15 | -2.984426000 | 0.134831000  | 0.005052000  |
| 1  | 1.604542000  | 2.028194000  | 0.071175000  |
| 1  | 1.392966000  | -2.207537000 | -0.071096000 |
| 6  | 3.233735000  | -0.135523000 | 0.000661000  |
| 6  | 3.769930000  | 0.616019000  | -1.237628000 |
| 6  | 3.787023000  | -1.569603000 | -0.038834000 |
| 1  | 3.472252000  | -2.151175000 | 0.830386000  |
| 1  | 3.473496000  | -2.102272000 | -0.939204000 |
| 1  | 4.878784000  | -1.540429000 | -0.037254000 |
| 1  | 3.410644000  | 0.153351000  | -2.159442000 |
| 1  | 4.863197000  | 0.598645000  | -1.251618000 |
| 1  | 3.454709000  | 1.660618000  | -1.244513000 |
| 6  | -1.010990000 | 2.625323000  | -0.006793000 |
| 6  | -1.373838000 | 2.974665000  | -1.467891000 |
| 6  | -0.087882000 | 3.730197000  | 0.544403000  |
| 1  | 0.257314000  | 3.501906000  | 1.554894000  |
| 1  | 0.785199000  | 3.886699000  | -0.089796000 |
| 1  | -0.630530000 | 4.677753000  | 0.577154000  |
| 1  | -0.471024000 | 3.021463000  | -2.079313000 |
| 1  | -1.871207000 | 3.947559000  | -1.520843000 |
| 1  | -2.040244000 | 2.226163000  | -1.898776000 |
| 6  | -1.267872000 | -2.538854000 | 0.004285000  |
| 6  | -0.467709000 | -3.724131000 | -0.571419000 |
| 6  | -2.535063000 | -2.421721000 | -0.845104000 |
| 1  | -3.262778000 | -1.694730000 | -0.397327000 |

|   |              |              |              |
|---|--------------|--------------|--------------|
| 1 | -2.332376000 | -2.126096000 | -1.873110000 |
| 1 | -3.116378000 | -3.347854000 | -0.839406000 |
| 1 | -0.113084000 | -3.518255000 | -1.583508000 |
| 1 | -1.104123000 | -4.611300000 | -0.608666000 |
| 1 | 0.393209000  | -3.976938000 | 0.048349000  |
| 6 | -1.647124000 | -2.863980000 | 1.466532000  |
| 1 | -2.235543000 | -2.058453000 | 1.908343000  |
| 1 | -2.232773000 | -3.786422000 | 1.519769000  |
| 1 | -0.746675000 | -2.999114000 | 2.068250000  |
| 6 | -2.272639000 | 2.645671000  | 0.858984000  |
| 1 | -2.753367000 | 3.627540000  | 0.849425000  |
| 1 | -3.076277000 | 1.990957000  | 0.434248000  |
| 1 | -2.086449000 | 2.341889000  | 1.887945000  |
| 6 | 3.770215000  | 0.545839000  | 1.278656000  |
| 1 | 4.863467000  | 0.527961000  | 1.290505000  |
| 1 | 3.454557000  | 1.588056000  | 1.345005000  |
| 1 | 3.412130000  | 0.031533000  | 2.173196000  |

Mes\*P\_TS

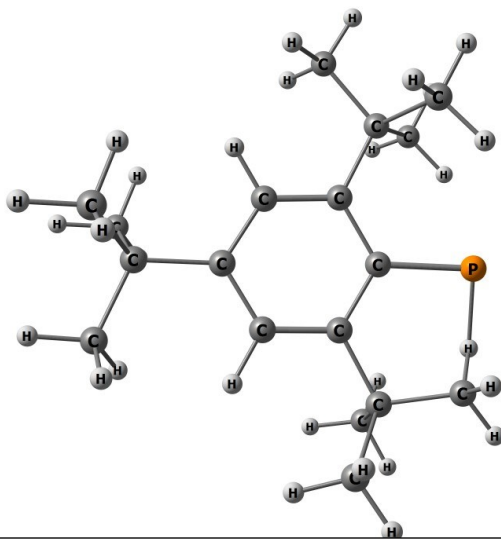

Method : UB3LYP/def2-TZVP  
Charge : 0  
Multiplicity : 1  
Total energy: -1044.9111453 a.u.

|    |              |              |              |
|----|--------------|--------------|--------------|
| 6  | -0.488905000 | -1.209214000 | -0.045427000 |
| 6  | -1.148870000 | 0.038842000  | -0.005846000 |
| 6  | 0.902100000  | -1.276912000 | -0.036605000 |
| 6  | 1.029106000  | 1.089138000  | 0.010323000  |
| 6  | -0.357405000 | 1.225298000  | 0.008010000  |
| 6  | 1.696188000  | -0.138178000 | -0.007327000 |
| 15 | -2.994222000 | 0.088628000  | -0.014777000 |
| 1  | 1.628412000  | 1.985874000  | 0.024532000  |
| 1  | 1.368108000  | -2.251449000 | -0.053862000 |
| 6  | 3.232976000  | -0.182514000 | 0.001150000  |
| 6  | 3.783701000  | 0.557158000  | -1.237626000 |
| 6  | 3.775405000  | -1.621077000 | -0.026149000 |
| 1  | 3.451311000  | -2.194857000 | 0.844892000  |
| 1  | 3.462816000  | -2.156726000 | -0.925183000 |
| 1  | 4.867299000  | -1.600681000 | -0.018366000 |
| 1  | 3.426405000  | 0.092633000  | -2.159303000 |
| 1  | 4.876808000  | 0.529257000  | -1.244027000 |
| 1  | 3.478659000  | 1.604516000  | -1.252412000 |
| 6  | -0.978072000 | 2.644841000  | -0.001326000 |
| 6  | -1.734622000 | 2.878125000  | -1.328916000 |
| 6  | 0.080216000  | 3.759947000  | 0.105845000  |
| 1  | 0.662921000  | 3.687374000  | 1.026513000  |
| 1  | 0.768615000  | 3.760146000  | -0.741208000 |
| 1  | -0.424997000 | 4.728037000  | 0.112595000  |
| 1  | -1.046129000 | 2.813864000  | -2.174284000 |
| 1  | -2.189234000 | 3.872331000  | -1.334298000 |
| 1  | -2.529209000 | 2.149152000  | -1.495833000 |
| 6  | -1.302248000 | -2.511167000 | -0.004757000 |
| 6  | -0.739972000 | -3.601483000 | -0.938095000 |
| 6  | -2.720332000 | -2.196017000 | -0.469524000 |
| 1  | -3.133585000 | -1.430099000 | 0.416638000  |

|   |              |              |              |
|---|--------------|--------------|--------------|
| 1 | -2.796914000 | -1.943717000 | -1.520054000 |
| 1 | -3.456657000 | -2.967966000 | -0.230970000 |
| 1 | -0.632899000 | -3.230620000 | -1.958922000 |
| 1 | -1.407694000 | -4.466935000 | -0.954364000 |
| 1 | 0.235462000  | -3.953467000 | -0.600249000 |
| 6 | -1.342266000 | -3.043368000 | 1.445007000  |
| 1 | -1.780377000 | -2.306700000 | 2.122076000  |
| 1 | -1.928765000 | -3.964606000 | 1.508531000  |
| 1 | -0.333029000 | -3.258716000 | 1.797823000  |
| 6 | -1.927528000 | 2.833000000  | 1.199390000  |
| 1 | -2.375411000 | 3.829484000  | 1.174029000  |
| 1 | -2.749637000 | 2.111547000  | 1.221538000  |
| 1 | -1.385385000 | 2.722431000  | 2.141102000  |
| 6 | 3.764879000  | 0.502177000  | 1.279248000  |
| 1 | 4.857853000  | 0.476277000  | 1.299365000  |
| 1 | 3.456157000  | 1.546900000  | 1.337072000  |
| 1 | 3.396322000  | -0.004279000 | 2.174035000  |

8

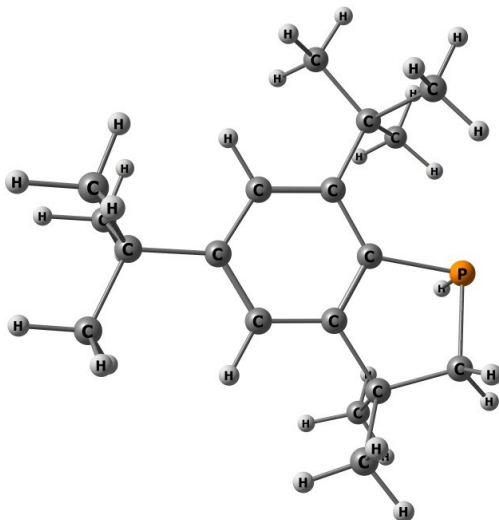

Method : UB3LYP/def2-TZVP  
 Charge : 0  
 Multiplicity : 1  
 Total energy: -1045.0055624 a.u.

|    |              |              |              |
|----|--------------|--------------|--------------|
| 6  | -0.488905000 | -1.209214000 | -0.045427000 |
| 6  | -1.148870000 | 0.038842000  | -0.005846000 |
| 6  | 0.902100000  | -1.276912000 | -0.036605000 |
| 6  | 1.029106000  | 1.089138000  | 0.010323000  |
| 6  | -0.357405000 | 1.225298000  | 0.008010000  |
| 6  | 1.696188000  | -0.138178000 | -0.007327000 |
| 15 | -2.994222000 | 0.088628000  | -0.014777000 |
| 1  | 1.628412000  | 1.985874000  | 0.024532000  |
| 1  | 1.368108000  | -2.251449000 | -0.053862000 |
| 6  | 3.232976000  | -0.182514000 | 0.001150000  |
| 6  | 3.783701000  | 0.557158000  | -1.237626000 |
| 6  | 3.775405000  | -1.621077000 | -0.026149000 |
| 1  | 3.451311000  | -2.194857000 | 0.844892000  |
| 1  | 3.462816000  | -2.156726000 | -0.925183000 |
| 1  | 4.867299000  | -1.600681000 | -0.018366000 |
| 1  | 3.426405000  | 0.092633000  | -2.159303000 |
| 1  | 4.876808000  | 0.529257000  | -1.244027000 |
| 1  | 3.478659000  | 1.604516000  | -1.252412000 |
| 6  | -0.978072000 | 2.644841000  | -0.001326000 |
| 6  | -1.734622000 | 2.878125000  | -1.328916000 |
| 6  | 0.080216000  | 3.759947000  | 0.105845000  |
| 1  | 0.662921000  | 3.687374000  | 1.026513000  |
| 1  | 0.768615000  | 3.760146000  | -0.741208000 |
| 1  | -0.424997000 | 4.728037000  | 0.112595000  |
| 1  | -1.046129000 | 2.813864000  | -2.174284000 |
| 1  | -2.189234000 | 3.872331000  | -1.334298000 |
| 1  | -2.529209000 | 2.149152000  | -1.495833000 |
| 6  | -1.302248000 | -2.511167000 | -0.004757000 |
| 6  | -0.739972000 | -3.601483000 | -0.938095000 |
| 6  | -2.720332000 | -2.196017000 | -0.469524000 |
| 1  | -3.133585000 | -1.430099000 | 0.416638000  |



|   |              |              |              |
|---|--------------|--------------|--------------|
| 1 | -2.796914000 | -1.943717000 | -1.520054000 |
| 1 | -3.456657000 | -2.967966000 | -0.230970000 |
| 1 | -0.632899000 | -3.230620000 | -1.958922000 |
| 1 | -1.407694000 | -4.466935000 | -0.954364000 |
| 1 | 0.235462000  | -3.953467000 | -0.600249000 |
| 6 | -1.342266000 | -3.043368000 | 1.445007000  |
| 1 | -1.780377000 | -2.306700000 | 2.122076000  |
| 1 | -1.928765000 | -3.964606000 | 1.508531000  |
| 1 | -0.333029000 | -3.258716000 | 1.797823000  |
| 6 | -1.927528000 | 2.833000000  | 1.199390000  |
| 1 | -2.375411000 | 3.829484000  | 1.174029000  |
| 1 | -2.749637000 | 2.111547000  | 1.221538000  |
| 1 | -1.385385000 | 2.722431000  | 2.141102000  |
| 6 | 3.764879000  | 0.502177000  | 1.279248000  |
| 1 | 4.857853000  | 0.476277000  | 1.299365000  |
| 1 | 3.456157000  | 1.546900000  | 1.337072000  |
| 1 | 3.396322000  | -0.004279000 | 2.174035000  |

DmpP\_T

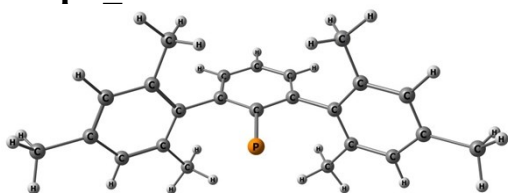

Method : UB3LYP/def2-TZVP  
Charge : 0  
Multiplicity : 3  
Total energy: -1271.2594820 a.u.

|    |              |              |              |
|----|--------------|--------------|--------------|
| 6  | -1.225298000 | 0.000100000  | 1.007018000  |
| 6  | 0.000001000  | 0.000021000  | 0.293062000  |
| 6  | -1.204405000 | 0.000245000  | 2.399330000  |
| 6  | 1.204397000  | 0.000239000  | 2.399335000  |
| 6  | 1.225298000  | 0.000100000  | 1.007021000  |
| 6  | -0.000005000 | 0.000310000  | 3.095418000  |
| 15 | 0.000004000  | -0.000194000 | -1.522058000 |
| 1  | 2.143540000  | 0.000300000  | 2.940562000  |
| 1  | -2.143549000 | 0.000309000  | 2.940554000  |
| 6  | -2.540873000 | 0.000027000  | 0.289470000  |
| 6  | -3.169699000 | -1.217286000 | -0.029906000 |
| 6  | -3.169711000 | 1.217285000  | -0.030114000 |
| 6  | -4.406010000 | -1.193633000 | -0.673919000 |
| 6  | -4.406019000 | 1.193521000  | -0.674120000 |
| 6  | -5.042810000 | -0.000089000 | -1.004381000 |
| 1  | -4.882558000 | -2.135733000 | -0.924421000 |
| 1  | -4.882574000 | 2.135574000  | -0.924779000 |
| 6  | 2.540878000  | 0.000025000  | 0.289482000  |
| 6  | 3.169726000  | 1.217284000  | -0.030107000 |
| 6  | 3.169694000  | -1.217286000 | -0.029894000 |
| 6  | 4.406038000  | 1.193513000  | -0.674091000 |
| 6  | 4.406009000  | -1.193639000 | -0.673914000 |
| 6  | 5.042819000  | -0.000106000 | -1.004367000 |
| 1  | 4.882613000  | 2.135567000  | -0.924717000 |
| 1  | 4.882555000  | -2.135741000 | -0.924409000 |
| 1  | -0.000006000 | 0.000413000  | 4.178860000  |
| 6  | -2.528450000 | -2.542668000 | 0.301399000  |
| 1  | -1.575106000 | -2.666251000 | -0.218298000 |
| 1  | -2.321465000 | -2.635827000 | 1.369732000  |
| 1  | -3.177784000 | -3.368449000 | 0.009638000  |
| 6  | -6.394368000 | -0.000155000 | -1.672726000 |
| 1  | -6.528450000 | -0.883627000 | -2.299206000 |
| 1  | -7.199510000 | -0.000181000 | -0.931370000 |
| 1  | -6.528526000 | 0.883286000  | -2.299232000 |
| 6  | -2.528477000 | 2.542726000  | 0.301001000  |
| 1  | -2.321729000 | 2.636134000  | 1.369361000  |
| 1  | -1.575018000 | 2.666142000  | -0.218515000 |
| 1  | -3.177718000 | 3.368461000  | 0.008905000  |
| 6  | 2.528444000  | -2.542670000 | 0.301408000  |
| 1  | 2.321321000  | -2.635770000 | 1.369718000  |
| 1  | 1.575173000  | -2.666315000 | -0.218411000 |

|   |             |              |              |
|---|-------------|--------------|--------------|
| 1 | 3.177840000 | -3.368448000 | 0.009778000  |
| 6 | 2.528452000 | 2.542730000  | 0.300906000  |
| 1 | 1.575406000 | 2.666412000  | -0.219321000 |
| 1 | 2.320898000 | 2.635893000  | 1.369123000  |
| 1 | 3.178021000 | 3.368450000  | 0.009494000  |
| 6 | 6.394377000 | -0.000143000 | -1.672710000 |
| 1 | 7.199524000 | 0.001764000  | -0.931363000 |
| 1 | 6.529192000 | -0.884537000 | -2.297722000 |
| 1 | 6.527792000 | 0.882372000  | -2.300688000 |

**9a**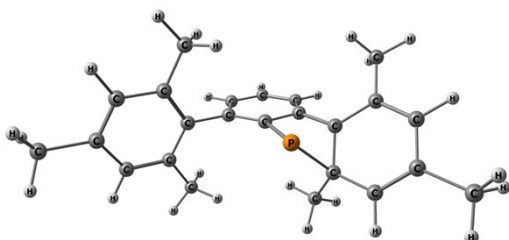

Method : UB3LYP/def2-TZVP  
 Charge : 0  
 Multiplicity : 1  
 Total energy: -1271.2400280 a.u.

|    |              |              |              |
|----|--------------|--------------|--------------|
| 6  | -1.200938000 | 1.347036000  | 0.367252000  |
| 6  | -0.049982000 | 0.593799000  | 0.124454000  |
| 6  | -1.132522000 | 2.629062000  | 0.872579000  |
| 6  | 1.290180000  | 2.414989000  | 0.840008000  |
| 6  | 1.223529000  | 1.097166000  | 0.342100000  |
| 6  | 0.147100000  | 3.159978000  | 1.101213000  |
| 15 | -0.866800000 | -0.958066000 | -0.526518000 |
| 1  | 2.264443000  | 2.856508000  | 1.017603000  |
| 1  | -2.017165000 | 3.220725000  | 1.074895000  |
| 6  | -2.309028000 | 0.387369000  | 0.021661000  |
| 6  | -3.468336000 | 0.692291000  | -0.800450000 |
| 6  | -2.268682000 | -0.849291000 | 0.867543000  |
| 6  | -4.434116000 | -0.247623000 | -0.946498000 |
| 6  | -3.343400000 | -1.802535000 | 0.559232000  |
| 6  | -4.357589000 | -1.536045000 | -0.296415000 |
| 1  | -5.286918000 | -0.043732000 | -1.584765000 |
| 1  | -3.324259000 | -2.747371000 | 1.092487000  |
| 6  | 2.463664000  | 0.316242000  | 0.044562000  |
| 6  | 3.003034000  | 0.319511000  | -1.254116000 |
| 6  | 3.094518000  | -0.423490000 | 1.060038000  |
| 6  | 4.162584000  | -0.411778000 | -1.510659000 |
| 6  | 4.252316000  | -1.141025000 | 0.760204000  |
| 6  | 4.805381000  | -1.146711000 | -0.517761000 |
| 1  | 4.572299000  | -0.406541000 | -2.515527000 |
| 1  | 4.731765000  | -1.713085000 | 1.547959000  |
| 1  | 0.246695000  | 4.170732000  | 1.478362000  |
| 6  | -3.536733000 | 2.012347000  | -1.514493000 |
| 1  | -3.579474000 | 2.851892000  | -0.816668000 |
| 1  | -2.649136000 | 2.163650000  | -2.135010000 |
| 1  | -4.417323000 | 2.059644000  | -2.155453000 |
| 6  | -5.447843000 | -2.536203000 | -0.570992000 |
| 1  | -6.430264000 | -2.118992000 | -0.331534000 |
| 1  | -5.466653000 | -2.810375000 | -1.629837000 |
| 1  | -5.312128000 | -3.447550000 | 0.011556000  |
| 6  | 2.534285000  | -0.466189000 | 2.461052000  |
| 1  | 2.450374000  | 0.532740000  | 2.894503000  |
| 1  | 1.532664000  | -0.902639000 | 2.475453000  |
| 1  | 3.170813000  | -1.065172000 | 3.113064000  |
| 6  | 2.347920000  | 1.093679000  | -2.372297000 |

|   |              |              |              |
|---|--------------|--------------|--------------|
| 1 | 1.355116000  | 0.700079000  | -2.604488000 |
| 1 | 2.216919000  | 2.145968000  | -2.110980000 |
| 1 | 2.948782000  | 1.041613000  | -3.280736000 |
| 6 | 6.076937000  | -1.902459000 | -0.810956000 |
| 1 | 6.955712000  | -1.268257000 | -0.657963000 |
| 1 | 6.183728000  | -2.770175000 | -0.157708000 |
| 1 | 6.103474000  | -2.251284000 | -1.844810000 |
| 6 | -1.849774000 | -0.824944000 | 2.325698000  |
| 1 | -2.681381000 | -0.481101000 | 2.949519000  |
| 1 | -1.579157000 | -1.831439000 | 2.650469000  |
| 1 | -1.001968000 | -0.165902000 | 2.499602000  |

9b

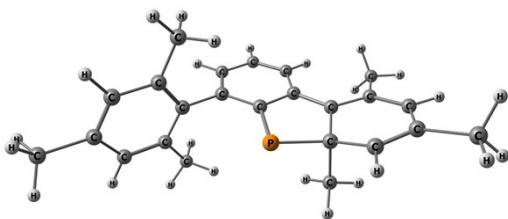

Method : UB3LYP/def2-TZVP  
Charge : 0  
Multiplicity : 1  
Total energy: -1271.2446414 a.u.

|    |              |              |              |
|----|--------------|--------------|--------------|
| 6  | -1.297312000 | 1.247944000  | -0.003719000 |
| 6  | -0.049089000 | 0.488203000  | 0.022473000  |
| 6  | -1.214821000 | 2.669619000  | -0.166527000 |
| 6  | 1.207905000  | 2.525023000  | -0.291447000 |
| 6  | 1.209645000  | 1.168265000  | -0.124110000 |
| 6  | -0.004061000 | 3.276446000  | -0.306239000 |
| 15 | -0.229518000 | -1.230644000 | 0.226297000  |
| 1  | 2.150508000  | 3.046506000  | -0.412808000 |
| 1  | -2.109089000 | 3.271122000  | -0.173791000 |
| 6  | -2.434118000 | 0.445187000  | 0.117939000  |
| 6  | -3.825455000 | 0.767658000  | -0.050430000 |
| 6  | -2.093161000 | -0.979517000 | 0.454525000  |
| 6  | -4.702999000 | -0.261811000 | -0.256880000 |
| 6  | -3.045920000 | -1.993637000 | -0.079999000 |
| 6  | -4.312857000 | -1.651842000 | -0.374958000 |
| 1  | -5.750748000 | -0.022552000 | -0.408174000 |
| 1  | -2.721234000 | -3.027309000 | -0.131340000 |
| 6  | 2.494297000  | 0.399976000  | -0.110484000 |
| 6  | 3.028975000  | -0.098441000 | -1.311489000 |
| 6  | 3.176251000  | 0.186745000  | 1.100942000  |
| 6  | 4.231021000  | -0.805426000 | -1.277430000 |
| 6  | 4.375310000  | -0.524157000 | 1.088480000  |
| 6  | 4.921567000  | -1.028298000 | -0.089415000 |
| 1  | 4.635003000  | -1.193829000 | -2.206648000 |
| 1  | 4.893383000  | -0.691320000 | 2.027304000  |
| 1  | 0.048320000  | 4.351643000  | -0.428903000 |
| 6  | -4.348107000 | 2.182173000  | -0.075316000 |
| 1  | -4.028404000 | 2.750298000  | 0.800955000  |
| 1  | -4.006525000 | 2.723157000  | -0.961718000 |
| 1  | -5.438300000 | 2.178992000  | -0.094341000 |
| 6  | -5.344856000 | -2.650742000 | -0.826349000 |
| 1  | -6.196309000 | -2.674802000 | -0.139598000 |
| 1  | -5.737424000 | -2.394576000 | -1.814761000 |
| 1  | -4.926096000 | -3.656115000 | -0.879603000 |
| 6  | 2.632261000  | 0.707488000  | 2.408565000  |
| 1  | 2.558246000  | 1.797427000  | 2.408526000  |
| 1  | 1.630366000  | 0.318783000  | 2.603772000  |
| 1  | 3.275996000  | 0.413751000  | 3.238208000  |
| 6  | 2.333821000  | 0.122581000  | -2.633311000 |
| 1  | 1.298314000  | -0.222291000 | -2.606492000 |

|   |              |              |              |
|---|--------------|--------------|--------------|
| 1 | 2.310040000  | 1.181905000  | -2.900851000 |
| 1 | 2.847766000  | -0.412663000 | -3.432296000 |
| 6 | 6.234772000  | -1.769509000 | -0.080046000 |
| 1 | 7.078252000  | -1.076898000 | -0.162064000 |
| 1 | 6.366649000  | -2.334053000 | 0.844820000  |
| 1 | 6.303440000  | -2.467770000 | -0.915839000 |
| 6 | -2.215886000 | -1.095970000 | 2.049537000  |
| 1 | -3.259686000 | -0.914618000 | 2.311036000  |
| 1 | -1.936717000 | -2.093437000 | 2.387002000  |
| 1 | -1.586077000 | -0.359405000 | 2.547276000  |

**DmpP\_TS1**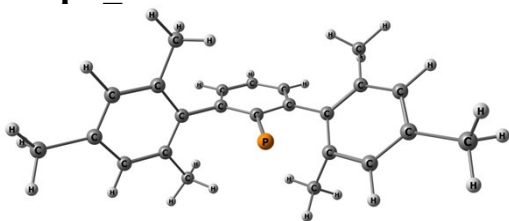

Method : UB3LYP/def2-TZVP  
Charge : 0  
Multiplicity : 1  
Total energy: -1271.223557 a.u.

|    |              |              |              |
|----|--------------|--------------|--------------|
| 6  | -1.277733000 | 1.295315000  | 0.415530000  |
| 6  | -0.098115000 | 0.517662000  | 0.219110000  |
| 6  | -1.198193000 | 2.676648000  | 0.613153000  |
| 6  | 1.202280000  | 2.541097000  | 0.409286000  |
| 6  | 1.161176000  | 1.168869000  | 0.217466000  |
| 6  | 0.039944000  | 3.298029000  | 0.625646000  |
| 15 | -0.342413000 | -1.241874000 | -0.053938000 |
| 1  | 2.164930000  | 3.041110000  | 0.397097000  |
| 1  | -2.095132000 | 3.258376000  | 0.783704000  |
| 6  | -2.471832000 | 0.465033000  | 0.291318000  |
| 6  | -3.558668000 | 0.759849000  | -0.560192000 |
| 6  | -2.356951000 | -0.859345000 | 0.859731000  |
| 6  | -4.425542000 | -0.269672000 | -0.899740000 |
| 6  | -3.294521000 | -1.859785000 | 0.455451000  |
| 6  | -4.306055000 | -1.595766000 | -0.430113000 |
| 1  | -5.224823000 | -0.048238000 | -1.600779000 |
| 1  | -3.201783000 | -2.846961000 | 0.895866000  |
| 6  | 2.411503000  | 0.380694000  | -0.019252000 |
| 6  | 2.908499000  | 0.224916000  | -1.325838000 |
| 6  | 3.097036000  | -0.203943000 | 1.062624000  |
| 6  | 4.079270000  | -0.507740000 | -1.525955000 |
| 6  | 4.262981000  | -0.925856000 | 0.817765000  |
| 6  | 4.773801000  | -1.087955000 | -0.468722000 |
| 1  | 4.454256000  | -0.628476000 | -2.537098000 |
| 1  | 4.783890000  | -1.377546000 | 1.655981000  |
| 1  | 0.114308000  | 4.364014000  | 0.798863000  |
| 6  | -3.755075000 | 2.120154000  | -1.180065000 |
| 1  | -4.098243000 | 2.851964000  | -0.445028000 |
| 1  | -2.824553000 | 2.500768000  | -1.603456000 |
| 1  | -4.503397000 | 2.075213000  | -1.971488000 |
| 6  | -5.268634000 | -2.654852000 | -0.898547000 |
| 1  | -6.306018000 | -2.342953000 | -0.755276000 |
| 1  | -5.134911000 | -2.860787000 | -1.964268000 |
| 1  | -5.119323000 | -3.589908000 | -0.358370000 |
| 6  | 2.576230000  | -0.079516000 | 2.472008000  |
| 1  | 2.437258000  | 0.963878000  | 2.762296000  |
| 1  | 1.606555000  | -0.575223000 | 2.566519000  |
| 1  | 3.263966000  | -0.541810000 | 3.181064000  |
| 6  | 2.206238000  | 0.845475000  | -2.509936000 |
| 1  | 1.144964000  | 0.590719000  | -2.526508000 |



|   |              |              |              |
|---|--------------|--------------|--------------|
| 1 | 2.272736000  | 1.936490000  | -2.486409000 |
| 1 | 2.652976000  | 0.503958000  | -3.444404000 |
| 6 | 6.054391000  | -1.849302000 | -0.702094000 |
| 1 | 6.927770000  | -1.214055000 | -0.524365000 |
| 1 | 6.135918000  | -2.707305000 | -0.031759000 |
| 1 | 6.118826000  | -2.214330000 | -1.728366000 |
| 6 | -1.919925000 | -0.980168000 | 2.334707000  |
| 1 | -2.790644000 | -0.781906000 | 2.967622000  |
| 1 | -1.555137000 | -1.981978000 | 2.553660000  |
| 1 | -1.140816000 | -0.265954000 | 2.583919000  |

**DmpP\_TS2**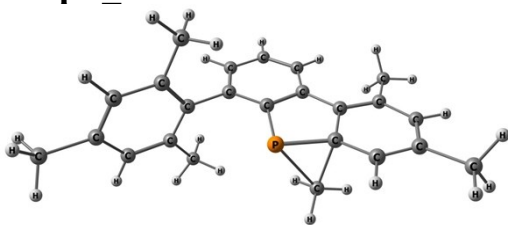

Method : UB3LYP/def2-TZVP  
Charge : 0  
Multiplicity : 1  
Total energy: -1271.2299937 a.u.

|    |              |              |              |
|----|--------------|--------------|--------------|
| 6  | -1.291283000 | 1.267693000  | -0.042204000 |
| 6  | -0.059471000 | 0.524303000  | -0.045719000 |
| 6  | -1.205363000 | 2.683486000  | -0.067654000 |
| 6  | 1.219420000  | 2.560740000  | -0.114912000 |
| 6  | 1.199517000  | 1.182586000  | -0.073374000 |
| 6  | 0.020551000  | 3.302290000  | -0.109552000 |
| 15 | -0.282945000 | -1.233107000 | -0.005805000 |
| 1  | 2.169884000  | 3.079976000  | -0.152703000 |
| 1  | -2.095898000 | 3.290540000  | -0.061695000 |
| 6  | -2.454921000 | 0.434642000  | -0.011546000 |
| 6  | -3.837995000 | 0.774538000  | -0.034158000 |
| 6  | -2.103145000 | -0.972870000 | 0.066380000  |
| 6  | -4.767364000 | -0.240216000 | -0.141773000 |
| 6  | -3.097984000 | -1.964294000 | -0.242086000 |
| 6  | -4.413040000 | -1.610603000 | -0.309560000 |
| 1  | -5.819757000 | 0.021859000  | -0.161202000 |
| 1  | -2.796909000 | -2.999174000 | -0.360414000 |
| 6  | 2.478365000  | 0.403449000  | -0.078321000 |
| 6  | 3.049119000  | -0.008259000 | -1.295814000 |
| 6  | 3.123309000  | 0.098799000  | 1.133889000  |
| 6  | 4.247329000  | -0.722486000 | -1.276749000 |
| 6  | 4.319901000  | -0.616333000 | 1.106363000  |
| 6  | 4.900386000  | -1.036125000 | -0.087984000 |
| 1  | 4.680131000  | -1.041445000 | -2.219307000 |
| 1  | 4.809582000  | -0.852413000 | 2.045636000  |
| 1  | 0.069832000  | 4.384552000  | -0.138652000 |
| 6  | -4.336830000 | 2.196294000  | 0.026579000  |
| 1  | -3.966201000 | 2.722342000  | 0.909440000  |
| 1  | -4.027167000 | 2.769647000  | -0.851130000 |
| 1  | -5.426379000 | 2.211757000  | 0.061348000  |
| 6  | -5.496367000 | -2.623033000 | -0.575911000 |
| 1  | -6.226943000 | -2.638654000 | 0.237760000  |
| 1  | -6.042584000 | -2.384922000 | -1.492857000 |
| 1  | -5.085269000 | -3.627729000 | -0.679599000 |
| 6  | 2.543361000  | 0.525689000  | 2.460411000  |
| 1  | 2.428002000  | 1.609952000  | 2.520385000  |
| 1  | 1.552914000  | 0.093112000  | 2.620953000  |
| 1  | 3.185243000  | 0.207417000  | 3.282348000  |
| 6  | 2.396042000  | 0.311862000  | -2.618645000 |
| 1  | 1.385351000  | -0.097651000 | -2.678986000 |

|   |              |              |              |
|---|--------------|--------------|--------------|
| 1 | 2.309307000  | 1.389903000  | -2.772300000 |
| 1 | 2.976443000  | -0.100993000 | -3.444163000 |
| 6 | 6.211122000  | -1.781691000 | -0.093466000 |
| 1 | 7.057956000  | -1.088412000 | -0.102050000 |
| 1 | 6.315025000  | -2.410748000 | 0.792504000  |
| 1 | 6.302444000  | -2.419269000 | -0.974354000 |
| 6 | -1.696660000 | -1.293689000 | 1.923000000  |
| 1 | -2.740955000 | -1.144770000 | 2.175882000  |
| 1 | -1.387401000 | -2.309865000 | 2.145973000  |
| 1 | -1.070479000 | -0.549052000 | 2.401097000  |

10

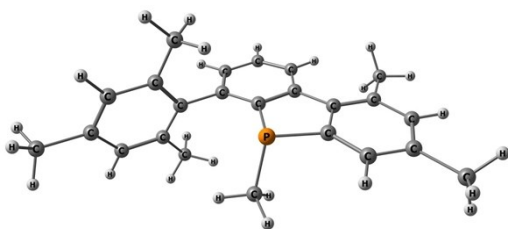

Method : UB3LYP/def2-TZVP  
 Charge : 0  
 Multiplicity : 1  
 Total energy: -1271.3256086 a.u.

|    |              |              |              |
|----|--------------|--------------|--------------|
| 6  | 1.352309000  | 1.289787000  | 0.047243000  |
| 6  | 0.135661000  | 0.563683000  | 0.056434000  |
| 6  | 1.291190000  | 2.687920000  | 0.028142000  |
| 6  | -1.124711000 | 2.606362000  | 0.018958000  |
| 6  | -1.104432000 | 1.208648000  | 0.051919000  |
| 6  | 0.059751000  | 3.332194000  | 0.010013000  |
| 15 | 0.414785000  | -1.249657000 | 0.217496000  |
| 1  | -2.077533000 | 3.122437000  | 0.009266000  |
| 1  | 2.186944000  | 3.286438000  | 0.027273000  |
| 6  | 2.552533000  | 0.423369000  | 0.059903000  |
| 6  | 3.917331000  | 0.786000000  | 0.040783000  |
| 6  | 2.222594000  | -0.948365000 | 0.093843000  |
| 6  | 4.870510000  | -0.233377000 | 0.041064000  |
| 6  | 3.197768000  | -1.936152000 | 0.109986000  |
| 6  | 4.546042000  | -1.590855000 | 0.067618000  |
| 1  | 5.918446000  | 0.048283000  | 0.026006000  |
| 1  | 2.912986000  | -2.981993000 | 0.162297000  |
| 6  | -2.395302000 | 0.448798000  | 0.077805000  |
| 6  | -2.909103000 | -0.034022000 | 1.295889000  |
| 6  | -3.114836000 | 0.244038000  | -1.113384000 |
| 6  | -4.118395000 | -0.728619000 | 1.293938000  |
| 6  | -4.317951000 | -0.461130000 | -1.069014000 |
| 6  | -4.838091000 | -0.956426000 | 0.123632000  |
| 1  | -4.507418000 | -1.100684000 | 2.236177000  |
| 1  | -4.862063000 | -0.625506000 | -1.993518000 |
| 1  | 0.025751000  | 4.415141000  | -0.004972000 |
| 6  | 4.411681000  | 2.211000000  | 0.020523000  |
| 1  | 4.063629000  | 2.750988000  | -0.863448000 |
| 1  | 4.080780000  | 2.769807000  | 0.899299000  |
| 1  | 5.501661000  | 2.230874000  | 0.009632000  |
| 6  | 5.623443000  | -2.644316000 | 0.036810000  |
| 1  | 5.926596000  | -2.867292000 | -0.990949000 |
| 1  | 6.515612000  | -2.318713000 | 0.574950000  |
| 1  | 5.279077000  | -3.577539000 | 0.485337000  |
| 6  | -2.623589000 | 0.782773000  | -2.436010000 |
| 1  | -2.741157000 | 1.868366000  | -2.491319000 |
| 1  | -1.564687000 | 0.575305000  | -2.595503000 |
| 1  | -3.186359000 | 0.346927000  | -3.262337000 |
| 6  | -2.182513000 | 0.185826000  | 2.599792000  |
| 1  | -1.262700000 | -0.402627000 | 2.644135000  |

|   |              |              |              |
|---|--------------|--------------|--------------|
| 1 | -1.901114000 | 1.232270000  | 2.732202000  |
| 1 | -2.808698000 | -0.108004000 | 3.442777000  |
| 6 | -6.156894000 | -1.687083000 | 0.153333000  |
| 1 | -6.983038000 | -0.999041000 | 0.357874000  |
| 1 | -6.364952000 | -2.171739000 | -0.802023000 |
| 1 | -6.170834000 | -2.452020000 | 0.931775000  |
| 6 | 0.030482000  | -1.905484000 | -1.496789000 |
| 1 | 0.465159000  | -1.288937000 | -2.283032000 |
| 1 | 0.430330000  | -2.917844000 | -1.569518000 |
| 1 | -1.051064000 | -1.957461000 | -1.619426000 |
